## **Striatal dopamine integrates cost, benefit and motivation**

Neir Eshel<sup>\*1</sup>, Gavin C. Toupponse<sup>1</sup>, Allan R. Wang<sup>1</sup>, Amber K. Osterman<sup>1</sup>, Amei N. Shank<sup>1</sup>, Alexandra M. Groome<sup>1,2</sup>, Lara Taniguchi<sup>1,3</sup>, Daniel F. Cardozo Pinto<sup>1</sup>, Jason Tucciarone<sup>1</sup>, Brandon S. Bentzley<sup>1,4</sup>, Robert C. Malenka<sup>\*1</sup>

\*co-corresponding authors

<sup>1</sup>Nancy Pritzker Laboratory, Dept. of Psychiatry and Behavioral Sciences, Stanford University School of Medicine, Stanford, CA 94305

<sup>2</sup>Department of Psychiatry, Icahn School of Medicine at Mount Sinai, New York, NY 10029

<sup>3</sup>Graduate Program in Neurobiology and Behavior, University of California Irvine, Irvine, CA 92697

<sup>4</sup>Magnus Medical, Burlingame, CA 94010

1 **ABSTRACT**

2 **Dopamine (DA) release in the ventral and dorsal striatum has been linked to reward**  
3 **processing and motivation, but there are longstanding controversies about whether DA**  
4 **release in these key target structures primarily reflects costs or benefits, and how these**  
5 **signals vary with motivation. Here we apply behavioral economic principles to generate**  
6 **demand curves for rewards while directly measuring DA release in the nucleus**  
7 **accumbens (NAc) and dorsolateral striatum (DLS) via a genetically-encoded sensor. By**  
8 **independently varying costs and benefits, we reveal that DA release in both structures**  
9 **incorporates reward magnitude and sunk cost. Surprisingly, motivation was inversely**  
10 **correlated with reward-evoked DA release; the higher the motivation for rewards the**  
11 **lower the reward-evoked DA release. These relationships between DA release, cost and**  
12 **motivation remained identical when we used optogenetic activation of striatal DA inputs**  
13 **as a reward. Our results reconcile previous disparate findings by demonstrating that**  
14 **during operant tasks, striatal DA release simultaneously encodes cost, benefit and**  
15 **motivation but in distinct manners over different time scales.**

16

17 **INTRODUCTION**

18 Decision making requires a consideration of both costs and benefits, as influenced by  
19 motivation. Although mesolimbic DA release is crucial for reward learning and therefore decision  
20 making<sup>1-4</sup>, prior studies have disagreed over its role in encoding costs, benefits or motivation.  
21 On the one hand, disruptions to DA signaling in the NAc with pharmacological manipulations or  
22 lesions bias animals towards low-cost, less-preferred rewards rather than high-cost, more-  
23 preferred rewards without affecting reward preference or overall consumption<sup>5-8</sup>. These results  
24 led to the conclusion that NAc DA release primarily mediates cost calculations; that is, how  
25 much effort an animal exerts to obtain rewards. However, these studies often confounded cost  
26 and benefit by varying both simultaneously, and used tools that could not examine how DA

27 activity dynamics in specific target structures underlie these behaviors. In contrast, studies of  
28 DA activity dynamics during instrumental tasks suggest that striatal DA more reliably encodes  
29 prospective benefit, not cost<sup>9–14</sup>. These studies, however, were mostly correlational and did not  
30 exploit causal tools such as optogenetics to explore how DA neuron activity directly influences  
31 behavior. Furthermore, DA recording studies have rarely explored changes in motivational state  
32 between individuals or across time except in studies of addiction, where there is longstanding  
33 debate over whether striatal DA release is sensitized<sup>15</sup> or depleted<sup>16</sup> once individuals transition  
34 to a highly-motivated, addicted state.

35 To address these limitations of previous work, we established a simple operant task that  
36 independently varies costs and benefits to generate behavioral economic demand curves in  
37 response to sucrose rewards or optogenetic stimulation of DA inputs. This approach yields a  
38 quantitative metric of motivation, defined by the willingness to overcome cost, independently  
39 from reward dose or preferred consumption at no cost. At the same time, we measured striatal  
40 DA release using a genetically-encoded sensor, allowing us to test how striatal DA release  
41 reflects costs, benefits and motivational state. We find that striatal DA release integrates cost  
42 and benefit on a trial-by-trial basis, and surprisingly, that high motivation dampens these  
43 signals. These findings reconcile discrepancies between prior studies on DA and help clarify the  
44 role of striatal DA signals in motivated behavior.

45

#### 46 **DA release in NAc and DLS signals both cost and benefit**

47 Mice learned to poke in an active nosepoke hole for access to sucrose reward, accompanied by  
48 a brief light-sound cue (Fig. 1a). Over training, mice increased the number of rewards earned in  
49 each session and decreased their latency to consume each reward (Fig. 1b). Once they  
50 reached a behavioral criterion (see Methods), mice advanced to economic demand sessions, in  
51 which we varied the fixed ratio (FR, number of pokes required per reward) in 10-minute bins  
52 over 50 minutes (Fig. 1a). We considered the FR as the “cost” of reward. For each session,

53 reward “benefit” was fixed at a single combination of sucrose concentration and quantity.  
54 Between sessions, however, we varied the concentration and quantity, such that mice  
55 experienced four different benefits. As expected, mouse operant behavior was sensitive to both  
56 reward benefit (Fig. 1c, left) and cost (Fig. 1c, right).

57 While mice performed this task, we used fiber photometry and the fluorescent sensor  
58 GRAB-DA<sup>17</sup> to record DA release in two striatal regions (Extended Data Fig. 1): the NAc core,  
59 vital to reward learning and addiction<sup>18</sup>; and the DLS, long linked to movement initiation and  
60 habit formation<sup>19</sup>. In one influential theory, demand for drugs of abuse begins with DA release in  
61 the NAc, which then spirals up to the DLS once behavior becomes habitual<sup>20</sup>. However,  
62 compared to the NAc, many fewer studies have recorded DA release in the DLS during reward  
63 tasks.

64 We aligned our recordings to the cue denoting reward availability, as this cue stayed  
65 identical in all conditions even as the cost and benefit varied. Thus, any observed changes in  
66 DA release could not be due to the sensory qualities of the stimulus, but rather to the perceived  
67 meaning of the associated reward. As expected, we found that increased sucrose concentration  
68 (Fig. 1d) and quantity (Fig. 1f) enhanced cued DA release in the NAc. DLS DA exhibited the  
69 same pattern (Fig. 1e and 1g), although the kinetics of the DA response in DLS was strikingly  
70 faster than that observed in the NAc.

71 Surprisingly, increased cost clearly enhanced DA responses in both regions (Fig. 1h, i),  
72 despite the cue and reward being held constant. This effect was not due to differences in the  
73 amount of time between rewards, because even when we kept this time interval constant, DA  
74 release increased with increasing FR (Extended Data Fig. 2a, b). To determine whether the  
75 effect of cost on DA release might relate to the order the FRs were presented, we conducted  
76 two additional experiments. In one, we ran mice through the five FRs on different days, and still  
77 found the same effect (Extended Data Fig. 2c, d). In a second control experiment, we ran new  
78 cohorts of mice through two separate sessions: one where FR1 preceded FR10, and another

79 where FR10 preceded FR1. Regardless of order, DA release was larger for the higher FR  
80 (Extended Data Fig. 2e-h). We conclude that in both striatal regions, DA encodes both benefit  
81 and cost and that (sunk) cost positively correlates with DA release.

82

### 83 **Economic demand curves dissociate consumption from motivation**

84 To make rational decisions, individuals must combine cost and benefit to determine if the benefit  
85 is worth the cost. This cost-benefit calculus is at the heart of motivation<sup>21</sup>. To measure  
86 motivation, we turned to the classic economic analysis of demand curves<sup>22,23</sup>. For each session,  
87 we plotted reward consumption as a function of cost (Fig. 2a), revealing two orthogonal  
88 parameters:  $Q_0$ , the preferred level of consumption at no cost; and alpha, the sensitivity of  
89 consumption to cost (i.e., elasticity).  $Q_0$  is the y-intercept of the demand curve and is influenced  
90 predominantly by overall reward consumption or reward rate. In contrast, alpha, which depends  
91 on the demand curve's slope, is inversely proportional to the subject's motivation to obtain a  
92 reward<sup>24</sup>.

93 To validate that our analyses accurately reflected the consistency in subjects' behavior,  
94 we repeated the same demand curve assays with a constant sucrose reward on consecutive  
95 days and found that our metrics for motivation (Fig. 2b) and free consumption (Fig. 2c)  
96 remained consistent, with minor day-to-day variability. Furthermore, varying the reward  
97 magnitude did not cause changes in alpha, our measure of motivation (Fig. 2d), but did cause  
98 changes in  $Q_0$ , the free consumption parameter (Fig. 2e). This dissociation between motivation  
99 and free consumption is expected<sup>22</sup>, and helps ensure that the alpha parameter does not simply  
100 reflect the dose of the reward, but rather the reward's motivational value. In a typical subject,  
101 free consumption varied from session to session as different sucrose rewards were provided  
102 (Fig. 2f, left graph), but normalizing each demand curve by the free consumption (Fig. 2f, right  
103 graph) revealed that alpha, the slope of the curve and hence the motivational pull of sucrose,  
104 remained consistent despite changes in dose.

105           As a final test of the validity of the task, we asked whether the alpha parameter predicted  
106 another common metric for motivation: tolerance to punishment. In this new task, mice received  
107 sucrose reward at FR5 on 70% of trials, and in the remaining 30% of trials, they received both  
108 sucrose reward and a mild footshock (Fig. 2g). We found that the motivation parameter  
109 ( $1/\alpha$ ) calculated from previous demand curve assays (Fig. 2h), but not the free consumption  
110 parameter,  $Q_0$  (Fig. 2i), predicted the number of shocks a subject was willing to experience to  
111 obtain the reward. These results provide strong evidence that the behavioral economics task  
112 used in this study successfully measures motivation independently from dose or preferred  
113 consumption.

114

#### 115 **Striatal DA release inversely reflects a reward's motivational value**

116 To determine how striatal DA release relates to motivation or reward consumption, we took  
117 advantage of the daily variation in subjects' performance. Strikingly, DA release to a given fixed  
118 reward reflected motivation level (Fig. 3a, b) but not free consumption (Fig. 3c, d). In sessions  
119 when mice were more motivated for a given reward, less DA was released in both striatal  
120 regions (Fig. 3e, g and Extended Data Fig. 3). Furthermore, group comparisons revealed that  
121 mice with higher average motivation levels exhibited lower average DA responses to a fixed  
122 reward in both ventral and dorsal striatum (Fig. 3f, h). Thus, DA release reflects both day-to-day  
123 and individual-to-individual variability in motivation. In both cases, the lower the motivation, the  
124 higher the striatal DA release.

125

#### 126 **Optogenetically-evoked striatal DA release is sensitive to cost.**

127 All of the above results rely on sucrose reward, which is sensitive to circuits associated with  
128 taste and satiety. To bypass these circuits and examine the pure motivational effect of striatal  
129 DA release, in a separate group of mice we employed optogenetic self-stimulation. Each DAT-  
130 Cre mouse received two viral injections: one to deliver either the excitatory opsin ChRMINE or

131 the inert fluorophore mScarlet in DA neurons of the ventral tegmental area (VTA) or substantia  
132 nigra pars compacta (SNc), and another to deliver GRAB-DA in the appropriate target in the  
133 NAc or DLS. We then implanted a fiber over the NAc or DLS, allowing us to simultaneously  
134 stimulate DA inputs and record the resulting DA release. The task was identical as before,  
135 except that instead of poking for sucrose, mice poked for optogenetic stimulation of striatal DA  
136 release, accompanied by the same light-sound cue (Fig. 4a). As expected, mice learned to poke  
137 for DA input stimulation in both the NAc (Fig. 4b) and DLS (Fig. 4d), increasing both the number  
138 of rewards (left) and poking accuracy (right) over training. Control mice without opsin did not  
139 learn the task for light stimulation in either NAc (Fig. 4c) or DLS (Fig. 4e).

140         Despite using identical light stimulation parameters, as cost increased (i.e. the number of  
141 nose pokes required to receive stimulation), optogenetically-evoked DA release in both the NAc  
142 (Fig. 4f) and the DLS (Fig. 4h) increased. Control mice, who occasionally nose-poked despite  
143 receiving no reward, exhibited no relationship between cost and DA release (Fig. 4g, i).  
144 Although these results are consistent with the sucrose experiment (Fig. 1h, i), they were  
145 unexpected in that they suggest that the effort put forth by a subject dramatically influences the  
146 magnitude of optogenetically-evoked striatal DA release. Thus, we considered an alternative  
147 plausible interpretation: that the effect of varying the FR on optogenetic striatal DA release  
148 might reflect the longer interval between light stimulation during higher FRs. Perhaps at shorter  
149 time intervals, optogenetic stimulation of DA inputs depletes DA and reduces the amount of DA  
150 release for subsequent stimulations. However, when we analyzed trials with similar reward  
151 intervals at different FRs, the effect held (Extended Data Fig. 4a, b).

152         As a further test of the potential influence of the interval between optogenetic  
153 stimulations, we conducted an experiment under anesthesia, in which light stimulations were  
154 delivered at different intervals based on the average intervals for each FR in our task. Again, DA  
155 release was not influenced by the interval between light stimulations (Extended Data Fig. 4c, d).  
156 Finally, we considered if the order of FRs could explain the results; for example due to

157 photobleaching of the sensor over the course of each session. We thus examined how DA  
158 release changed over time in a session where optogenetic stimulation was delivered without  
159 cost (Extended Data Fig. 4e, f) or with cost held constant (Extended Data Fig. 4g, h). In both  
160 cases, we found that DA release did not differ based on whether optogenetic stimulation was  
161 delivered at the beginning or the end of the session. Therefore, we conclude that DA release  
162 evoked by local optogenetic stimulation of DA inputs in both the NAc and DLS is greatly  
163 influenced by the effort put forth to gain that reward, i.e. the sunk cost.

164

### 165 **Optogenetically-evoked DA release is inversely related to motivation**

166 Analysis of behavioral economic demand curves provides a platform for determining the intrinsic  
167 motivational value of striatal DA release. Similar to our experiments using sucrose as the  
168 reward, we took advantage of variations in motivation from day to day and mouse to mouse and  
169 compared optogenetically-induced DA release in high- versus low-motivation sessions.  
170 Consistent with previous results, DA release was greater during low motivation sessions in both  
171 the NAc and DLS (Fig. 5a, b and Extended Data Fig. 5). In contrast, the magnitude of free  
172 consumption did not affect optogenetic striatal DA release (Fig. 5c, d). The inverse relationship  
173 between motivation and optogenetic striatal DA release held both within each subject (Fig 5e, g)  
174 and between subjects (Fig. 5f, h). Thus, although DA release was required for animals to learn  
175 and perform the task (Fig. 4c, e), greater optogenetic striatal DA release reflected lower  
176 motivation.

177

### 178 **Testing the causal relationship between motivation and striatal DA release**

179 By examining the behavioral variability that routinely occurs within and between subjects during  
180 our operant tasks, we provide evidence that the motivation to obtain a natural reward, sucrose,  
181 as well as the artificial “reward” of optogenetically-triggered striatal DA release, is inversely  
182 correlated with the magnitude of striatal DA release evoked by that reward. Our evidence thus



183 far, however, cannot rule out an indirect or coincidental relationship between motivation and  
184 striatal DA release. To test the causal nature of this inverse relationship, we performed two  
185 further experiments. First, we sought to manipulate the intrinsic motivation for reward and  
186 observe the effect on striatal DA release elicited by that reward. To do so, we trained a new  
187 cohort of mice to nosepoke for sucrose reward and compared striatal DA release under two  
188 conditions: the standard condition, in which mice lack access to sucrose except for during the  
189 behavioral session; and a condition in which the animals had access to sucrose for 30 minutes  
190 before each behavioral session. As expected, prefeeding reduced motivation for sucrose (Fig.  
191 6a, c) and these sessions were associated with higher striatal DA release in response to the  
192 same sucrose reward that was provided during standard sessions (Fig. 6b, d). Thus, a simple  
193 “natural” manipulation that reduced motivation for food without impairing task performance  
194 resulted in enhanced cued DA release in both the NAc and DLS.

195         Second, we sought to manipulate the DA release elicited by a natural reward and  
196 observe the effect on motivation. A cohort of DAT-Cre mice received two viral injections: one to  
197 deliver the inhibitory opsin halorhodopsin (NpHR) in DA neurons of the VTA or SNc, and  
198 another to deliver GRAB-DA in the appropriate target in the NAc or DLS. We then implanted a  
199 fiber over the NAc or DLS, allowing us to simultaneously inhibit DA inputs and record the  
200 resulting DA release. Once they recovered from surgery, we trained these mice to nosepoke for  
201 sucrose reward in the same paradigm as before. After stabilizing their performance on the  
202 behavioral economics task, we used light to inhibit DA release during the 2-sec reward cue on  
203 each trial. We found that NpHR stimulation successfully reduced DA release in the NAc (Fig.  
204 6e) and DLS (Fig. 6g), and that this manipulation increased motivation for sucrose reward (Fig.  
205 6f, h). We conclude that there is a direct, bidirectional relationship between striatal DA release  
206 and motivation for natural reward.

207

208

## 209 **Discussion**

210 Striatal DA release has long been linked to motivation, but most studies of DA and motivation  
211 have not recorded DA activity dynamics, and most DA recording studies have not measured  
212 motivation. Here we employed concepts from behavioral economics to gauge motivation for  
213 both a natural reward, sucrose, and the artificial reward of optogenetically-evoked striatal DA  
214 release, all while recording DA transients in the NAc and DLS, two striatal regions implicated in  
215 reward processing and operant behavior.

216 Our experiments generated several surprising results that help resolve controversies  
217 about the functional roles of striatal DA. First, striatal DA encodes both reward magnitude and  
218 sunk cost, which is the cost that has already been paid. Most prior studies have examined DA  
219 responses before the cost is paid, finding minimal cost sensitivity<sup>9-14</sup> even though DA  
220 manipulations do appear to affect cost calculations<sup>5-8</sup>. In addition, influential recent work has  
221 debated whether DA activity dynamics better reflect reward value<sup>25</sup> or changes in reward  
222 value<sup>26</sup>, but these studies did not modulate cost and thus did not address how DA release  
223 signals cost-benefit trade-offs. By varying cost and measuring DA release after the cost is paid,  
224 we demonstrate robust cost sensitivity, helping resolve the longstanding debate about whether  
225 striatal DA release is primarily important for reward benefit or cost. Our results, consistent with  
226 some recent work<sup>27</sup>, demonstrate that DA release encodes both. These results also provide a  
227 neural mechanism for the longstanding psychological observation that we value rewards more if  
228 we worked harder for them<sup>28</sup>.

229 Second, by leveraging individual and temporal variation in motivation, we demonstrate  
230 that there is a surprising inverse relationship between transient DA release and motivation. The  
231 higher the subject's motivation, the lower the striatal DA release for a fixed reward, and vice  
232 versa. This finding may appear to contradict the commonly held notion that DA facilitates  
233 motivation<sup>4,29</sup>. However, it is consistent with the longstanding observation in stimulant addiction  
234 that the most severe drug users, who have high motivation to seek and ingest drugs of abuse,

235 exhibit decreases in drug-elicited DA release, which predict the magnitude of drug use and  
236 craving<sup>30,31</sup>. Our findings suggest that chronic drug use, rather than simply triggering a  
237 dysphoric, low-DA withdrawal state<sup>32,33</sup>, may tap into a previously unknown mechanism that  
238 modulates striatal DA release depending on motivation. Furthermore, this mechanism appears  
239 to work in a qualitatively similar way in both the NAc and the DLS, although the two sites had  
240 different release kinetics, perhaps because of greater dopamine transporter expression<sup>34</sup> and  
241 thus faster uptake<sup>35</sup> in dorsal compared to ventral striatum.

242 A third surprising finding was that striatal DA release elicited by optogenetic stimulation  
243 of DA inputs was highly context dependent in that it too was influenced by costs, benefits and  
244 motivation. Since we only activated DA axons, these results support the importance of local  
245 modulation of DA release<sup>36-39</sup> in addition to input integration at the level of DA cell bodies. They  
246 also emphasize that behavioral context can influence the neural consequences of “simple”  
247 optogenetic manipulations.

248 Our results support the proposal that striatal DA release encodes costs, benefits and  
249 motivation simultaneously but over different time scales. On a trial-by-trial basis, striatal DA  
250 release integrates benefit size and sunk cost. Motivation for rewards, in contrast, reflects a state  
251 that changes over slower time scales, consistent with recent work on hunger<sup>40,41</sup>, thirst<sup>41,42</sup>, and  
252 other internal homeostatic drives<sup>43,44</sup>. The striatal DA signals encoding reward are dampened  
253 when motivation is high and augmented when motivation is low. These results are consistent  
254 with an accelerator/brake model of DA action in which a high motivational state “releases the  
255 brake” such that a lighter push on the accelerator (i.e. smaller DA release) is necessary to  
256 initiate actions<sup>45,46</sup>. Future work that measures the downstream neural consequences of DA  
257 release in the striatum and other target regions may reveal how DA not only reflects motivation  
258 but also controls it.

259

- 260 1. Schultz, W., Stauffer, W. R. & Lak, A. The phasic dopamine signal maturing: from reward  
261 via behavioural activation to formal economic utility. *Curr. Opin. Neurobiol.* **43**, 139–148  
262 (2017).
- 263 2. Glimcher, P. W. Understanding dopamine and reinforcement learning: the dopamine reward  
264 prediction error hypothesis. *Proc. Natl. Acad. Sci. U.S.A.* **108 Suppl 3**, 15647–15654  
265 (2011).
- 266 3. Eshel, N. *et al.* Arithmetic and local circuitry underlying dopamine prediction errors. *Nature*  
267 **525**, 243–246 (2015).
- 268 4. Berke, J. D. What does dopamine mean? *Nat Neurosci* **21**, 787–793 (2018).
- 269 5. Salamone, J. D., Correa, M., Yang, J.-H., Rotolo, R. & Presby, R. Dopamine, effort-based  
270 choice, and behavioral economics: Basic and translational research. *Front Behav Neurosci*  
271 **12**, 52 (2018).
- 272 6. Ishiwari, K., Weber, S. M., Mingote, S., Correa, M. & Salamone, J. D. Accumbens dopamine  
273 and the regulation of effort in food-seeking behavior: modulation of work output by different  
274 ratio or force requirements. *Behav Brain Res* **151**, 83–91 (2004).
- 275 7. Nunes, E. J. *et al.* Effort-related motivational effects of the VMAT-2 inhibitor tetrabenazine:  
276 implications for animal models of the motivational symptoms of depression. *J Neurosci* **33**,  
277 19120–19130 (2013).
- 278 8. Salamone, J. D. *et al.* Mesolimbic dopamine and the regulation of motivated behavior. *Curr*  
279 *Top Behav Neurosci* **27**, 231–257 (2016).
- 280 9. Walton, M. E. & Bouret, S. What Is the relationship between dopamine and effort? *Trends*  
281 *Neurosci* **42**, 79–91 (2019).
- 282 10. Varazzani, C., San-Galli, A., Gilardeau, S. & Bouret, S. Noradrenaline and dopamine  
283 neurons in the reward/effort trade-off: a direct electrophysiological comparison in behaving  
284 monkeys. *J Neurosci* **35**, 7866–7877 (2015).

- 285 11. Pasquereau, B. & Turner, R. S. Limited encoding of effort by dopamine neurons in a cost-  
286 benefit trade-off task. *J Neurosci* **33**, 8288–8300 (2013).
- 287 12. Gan, J. O., Walton, M. E. & Phillips, P. E. M. Dissociable cost and benefit encoding of future  
288 rewards by mesolimbic dopamine. *Nat Neurosci* **13**, 25–27 (2010).
- 289 13. Wanat, M. J., Kuhnen, C. M. & Phillips, P. E. M. Delays conferred by escalating costs  
290 modulate dopamine release to rewards but not their predictors. *J Neurosci* **30**, 12020–  
291 12027 (2010).
- 292 14. Hollon, N. G., Arnold, M. M., Gan, J. O., Walton, M. E. & Phillips, P. E. M. Dopamine-  
293 associated cached values are not sufficient as the basis for action selection. *Proc Natl Acad*  
294 *Sci U S A* **111**, 18357–18362 (2014).
- 295 15. Samaha, A.-N., Khoo, S. Y.-S., Ferrario, C. R. & Robinson, T. E. Dopamine ‘ups and downs’  
296 in addiction revisited. *Trends Neurosci* **44**, 516–526 (2021).
- 297 16. Volkow, N. D., Koob, G. F. & McLellan, A. T. Neurobiologic advances from the brain disease  
298 model of addiction. *N Engl J Med* **374**, 363–371 (2016).
- 299 17. Sun, F. *et al.* A genetically encoded fluorescent sensor enables rapid and specific detection  
300 of dopamine in flies, fish, and mice. *Cell* **174**, 481–496.e19 (2018).
- 301 18. Volkow, N. D. & Morales, M. The brain on drugs: From reward to addiction. *Cell* **162**, 712–  
302 725 (2015).
- 303 19. Graybiel, A. M. & Grafton, S. T. The striatum: where skills and habits meet. *Cold Spring*  
304 *Harb Perspect Biol* **7**, a021691 (2015).
- 305 20. Lüscher, C., Robbins, T. W. & Everitt, B. J. The transition to compulsion in addiction. *Nat*  
306 *Rev Neurosci* **21**, 247–263 (2020).
- 307 21. Simpson, E. H. & Balsam, P. D. The behavioral neuroscience of motivation: An overview of  
308 concepts, measures, and translational applications. *Curr Top Behav Neurosci* **27**, 1–12  
309 (2016).

- 310 22. Hursh, S. R. & Silberberg, A. Economic demand and essential value. *Psychol Rev* **115**,  
311 186–198 (2008).
- 312 23. Bentzley, B. S., Fender, K. M. & Aston-Jones, G. The behavioral economics of drug self-  
313 administration: a review and new analytical approach for within-session procedures.  
314 *Psychopharmacology (Berl)* **226**, 113–125 (2013).
- 315 24. R. Hursh, S. Behavioral economics and the analysis of consumption and choice. in *The*  
316 *Wiley Blackwell Handbook of Operant and Classical Conditioning* 275–305 (John Wiley &  
317 Sons, Ltd, 2014). doi:10.1002/9781118468135.ch12.
- 318 25. Mohebi, A. *et al.* Dissociable dopamine dynamics for learning and motivation. *Nature* **570**,  
319 65–70 (2019).
- 320 26. Kim, H. R. *et al.* A unified framework for dopamine signals across timescales. *Cell* **183**,  
321 1600-1616.e25 (2020).
- 322 27. Tanaka, S., O’Doherty, J. P. & Sakagami, M. The cost of obtaining rewards enhances the  
323 reward prediction error signal of midbrain dopamine neurons. *Nat Commun* **10**, 3674 (2019).
- 324 28. Inzlicht, M., Shenhav, A. & Olivola, C. Y. The effort paradox: Effort is both costly and valued.  
325 *Trends Cogn Sci* **22**, 337–349 (2018).
- 326 29. Salamone, J. D. & Correa, M. The mysterious motivational functions of mesolimbic  
327 dopamine. *Neuron* **76**, 470–485 (2012).
- 328 30. Ashok, A. H., Mizuno, Y., Volkow, N. D. & Howes, O. D. Association of stimulant use with  
329 dopaminergic alterations in users of cocaine, amphetamine, or methamphetamine: A  
330 Systematic Review and Meta-analysis. *JAMA Psychiatry* **74**, 511–519 (2017).
- 331 31. Willuhn, I., Burgeno, L. M., Groblewski, P. A. & Phillips, P. E. M. Excessive cocaine use  
332 results from decreased phasic dopamine signaling in the striatum. *Nat Neurosci* **17**, 704–  
333 709 (2014).
- 334 32. Koob, G. F. & Le Moal, M. Drug addiction, dysregulation of reward, and allostasis.  
335 *Neuropsychopharmacology* **24**, 97–129 (2001).

- 336 33. Dackis, C. A. & Gold, M. S. New concepts in cocaine addiction: the dopamine depletion  
337 hypothesis. *Neurosci Biobehav Rev* **9**, 469–477 (1985).
- 338 34. Freed, C. *et al.* Dopamine transporter immunoreactivity in rat brain. *Journal of Comparative*  
339 *Neurology* **359**, 340–349 (1995).
- 340 35. Cragg, S. J., Hille, C. J. & Greenfield, S. A. Dopamine release and uptake dynamics within  
341 nonhuman primate striatum in vitro. *J. Neurosci.* **20**, 8209–8217 (2000).
- 342 36. Liu, C. & Kaeser, P. S. Mechanisms and regulation of dopamine release. *Curr Opin*  
343 *Neurobiol* **57**, 46–53 (2019).
- 344 37. Liu, C. *et al.* An action potential initiation mechanism in distal axons for the control of  
345 dopamine release. *Science* **375**, 1378–1385 (2022).
- 346 38. Kramer, P. F., Twedell, E. L., Shin, J. H., Zhang, R. & Khaliq, Z. M. Axonal mechanisms  
347 mediating  $\gamma$ -aminobutyric acid receptor type A (GABA-A) inhibition of striatal dopamine  
348 release. *Elife* **9**, e55729 (2020).
- 349 39. Holly, E. N., Davatolhagh, M. F., España, R. A. & Fuccillo, M. V. Striatal low-threshold  
350 spiking interneurons locally gate dopamine. *Curr Biol* **31**, 4139–4147.e6 (2021).
- 351 40. Burgess, C. R. *et al.* Hunger-dependent enhancement of food cue responses in mouse  
352 postrhinal cortex and lateral amygdala. *Neuron* **91**, 1154–1169 (2016).
- 353 41. Grove, J. C. R. *et al.* Dopamine subsystems that track internal states. *Nature* (2022)  
354 doi:10.1038/s41586-022-04954-0.
- 355 42. Allen, W. E. *et al.* Thirst-associated preoptic neurons encode an aversive motivational drive.  
356 *Science* **357**, 1149–1155 (2017).
- 357 43. Steinmetz, N. A., Zatka-Haas, P., Carandini, M. & Harris, K. D. Distributed coding of choice,  
358 action and engagement across the mouse brain. *Nature* **576**, 266–273 (2019).
- 359 44. Pettit, N. L., Yuan, X. C. & Harvey, C. D. Hippocampal place codes are gated by behavioral  
360 engagement. *Nat Neurosci* **25**, 561–566 (2022).

- 361 45. Beeler, J. A. & Mourra, D. To do or not to do: Dopamine, affordability and the economics of  
362 opportunity. *Front Integr Neurosci* **12**, 6 (2018).
- 363 46. Soutschek, A., Jetter, A. & Tobler, P. N. Toward a unifying account of dopamine's role in  
364 cost-benefit decision making. *Biological Psychiatry Global Open Science* (2022)  
365 doi:10.1016/j.bpsgos.2022.02.010.  
366



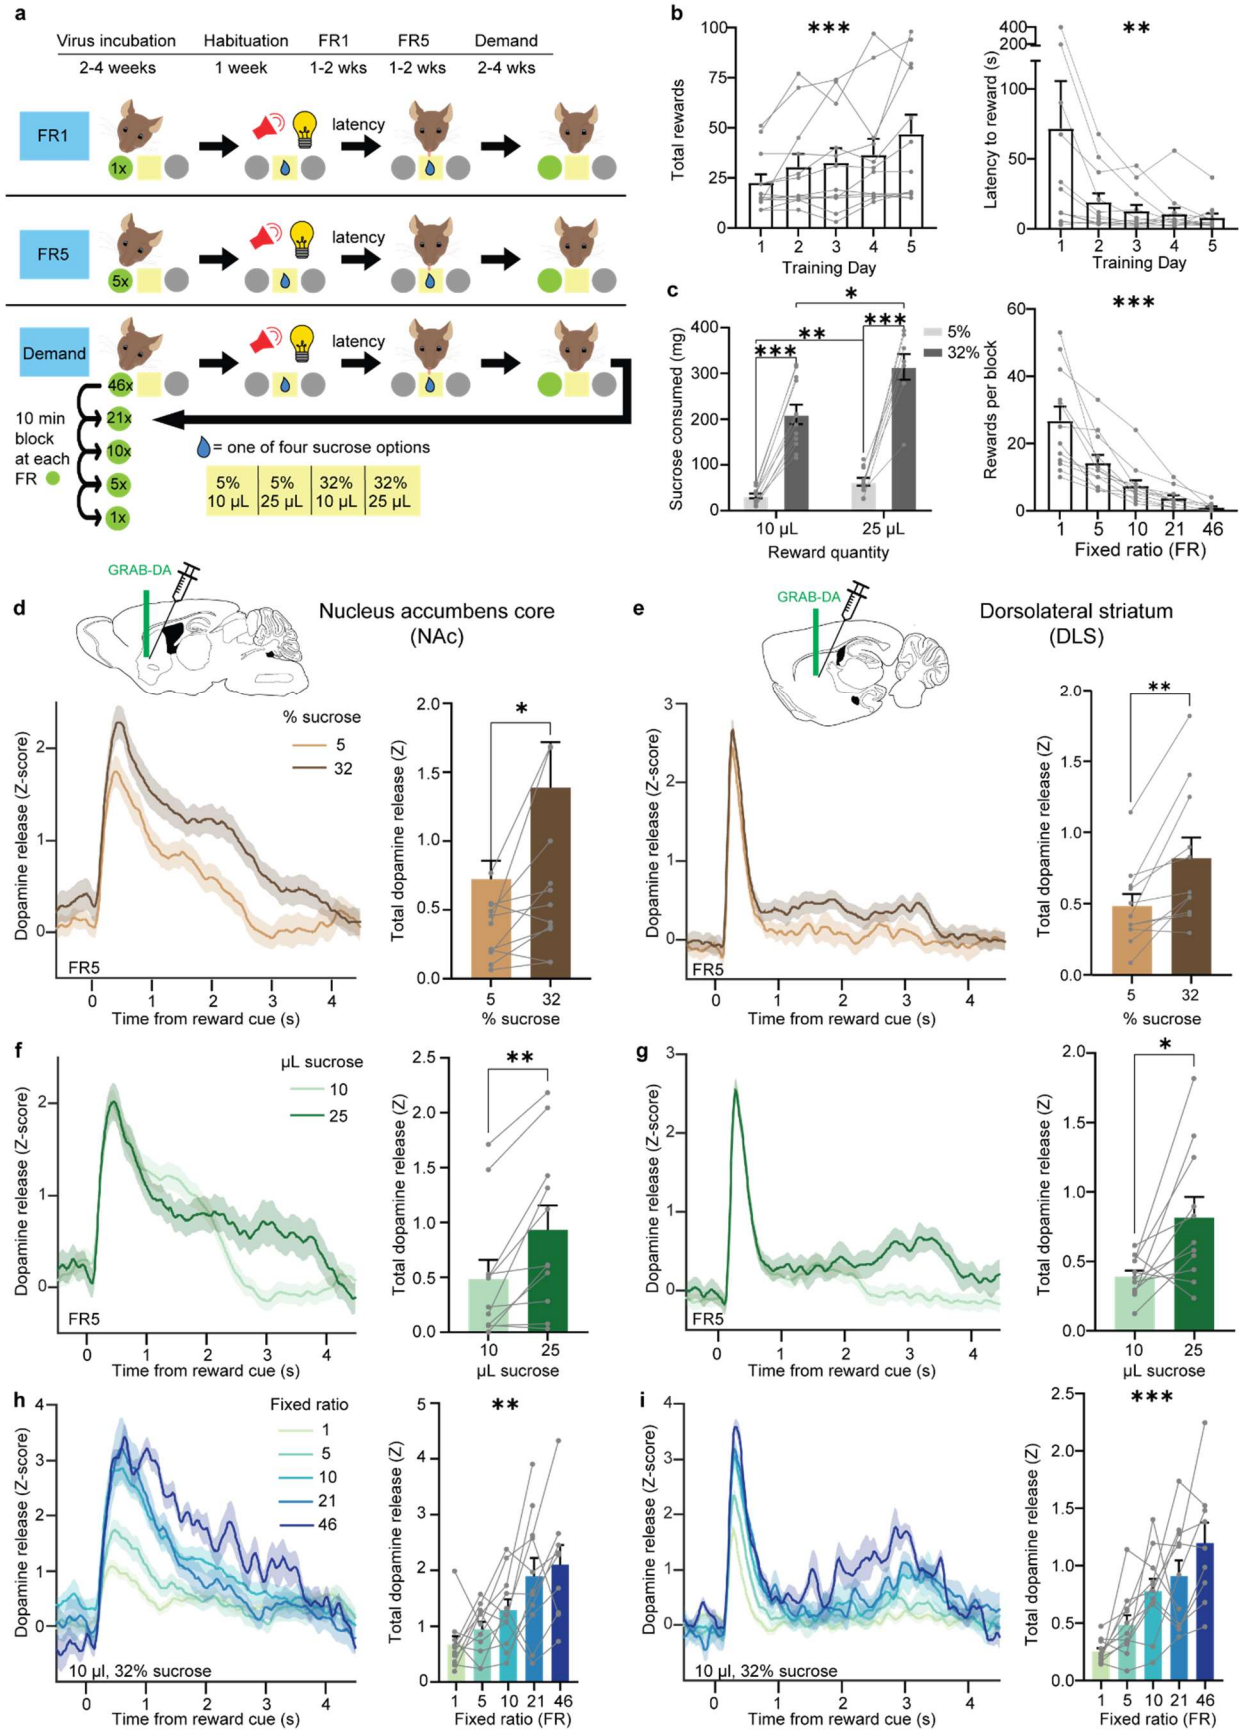

368 **Fig. 1: DA release in NAc and DLS encodes both benefit and cost.**

369 **a**, Experimental timeline and schematic of behavioral task. FR, fixed ratio. **b**, Left, number of  
370 rewards earned each day during FR1 training (Friedman test, Friedman statistic=22.4,  
371  $P=0.0002$ ;  $n=12$ ). Right, latency to enter reward port after light-sound cue (Friedman test,  
372 Friedman statistic=16.3,  $P=0.0026$ ;  $n=12$ ). **c**, Left, sucrose consumed per session as a function  
373 of the quantity and concentration of each reward (Mixed-effects model, fixed effect of quantity,  
374  $F_{1,11}=17.9$ ,  $P=0.0014$ ; fixed effect of concentration,  $F_{1,11}=176$ ,  $P<0.0001$ ; Tukey-corrected  
375 multiple comparisons:  $10\mu\text{L-5\%}$  vs  $10\mu\text{L-32\%}$ ,  $P<0.0001$ ;  $10\mu\text{L-5\%}$  vs  $25\mu\text{L-5\%}$ ,  $P=0.0029$ ;  
376  $10\mu\text{L-32\%}$  vs  $25\mu\text{L-32\%}$ ,  $P=0.024$ ;  $25\mu\text{L-5\%}$  vs  $25\mu\text{L-32\%}$ ,  $P=0.0001$ ;  $n=12$ ). Right, average  
377 number of rewards earned for each FR (Friedman test, Friedman statistic=47.6,  $P<0.0001$ ;  
378  $n=12$ ). **d-i**, Left, Z-scored photometry traces of GRAB-DA fluorescence aligned to reward-  
379 predicting cues. Right, area under the curve (AUC) of Z-scored photometry traces from 0 to 4s  
380 after cue onset as a function of sucrose concentration (**d**: Wilcoxon matched-pairs signed rank  
381 test,  $W=50$ ,  $P=0.024$ ;  $n=12$ ; **e**: Wilcoxon matched-pairs signed rank test,  $W=64$ ,  $P=0.002$ ;  $n=12$ ),  
382 sucrose quantity (**f**: Wilcoxon matched-pairs signed rank test,  $W=62$ ,  $P=0.003$ ;  $n=12$ , **g**:  
383 Wilcoxon matched-pairs signed rank test,  $W=54$ ,  $P=0.014$ ;  $n=12$ ) or FR (**h**: Friedman test,  
384 Friedman statistic=15.2,  $P=0.0043$ ;  $n=12$ , **i**: Friedman test, Friedman statistic=24.2,  $P<0.0001$ ;  
385  $n=12$ ). **d, f, h**, recordings in the NAc. **e, g, i**, recordings in the DLS. \* $P<0.05$ , \*\* $P<0.01$ ,  
386 \*\*\* $P<0.001$ . Error bars denote s.e.m.

387

388

389

390

391

392

393

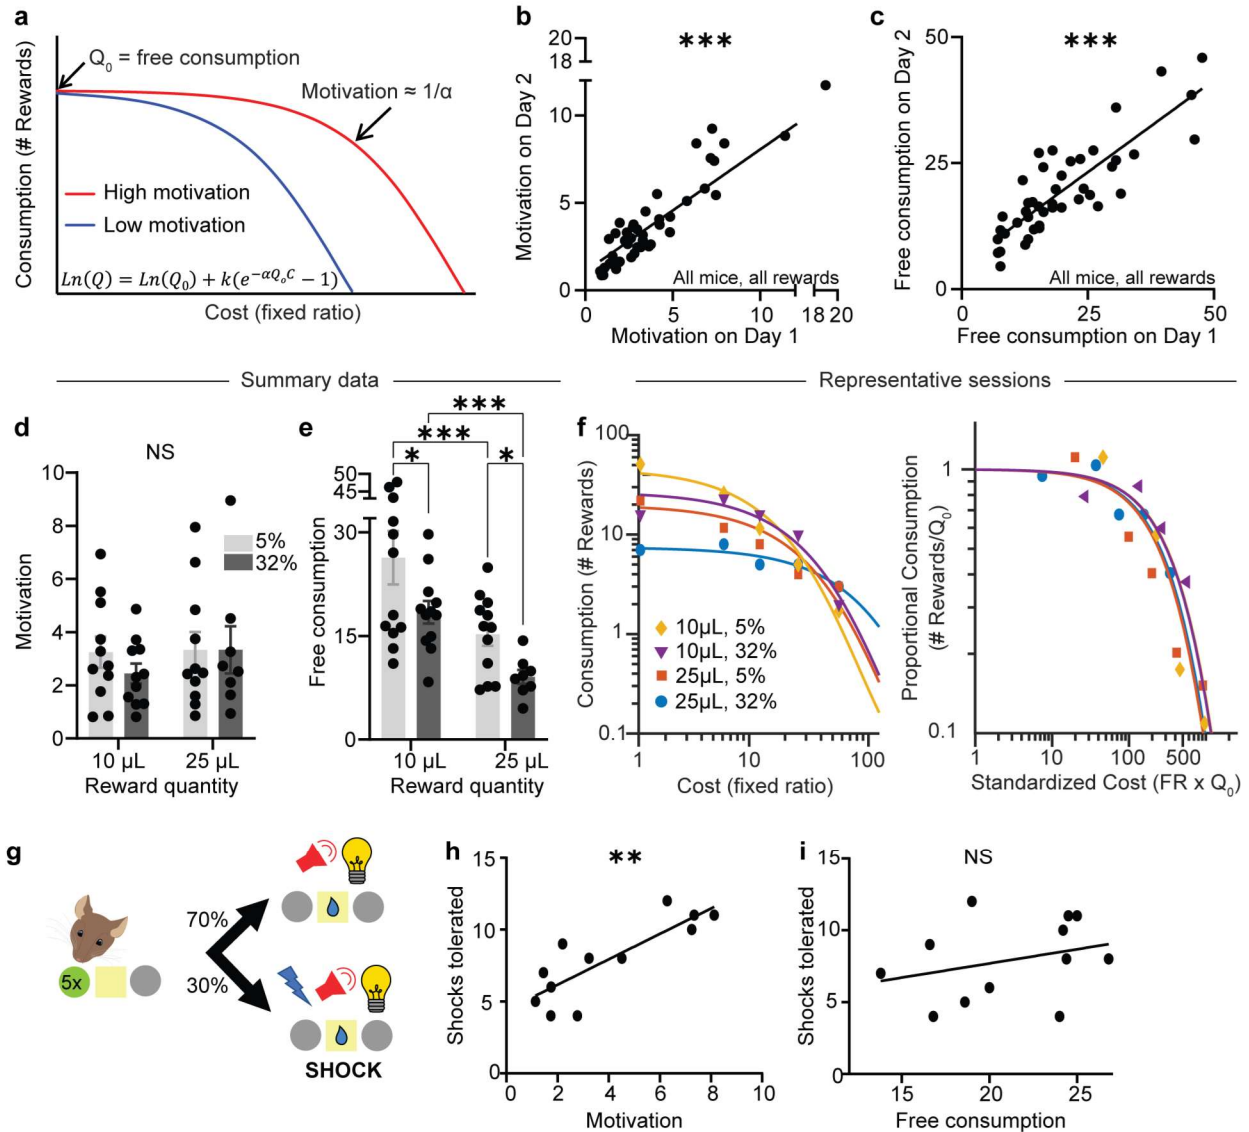

394

395 **Fig. 2: Economic demand curves dissociate consumption from motivation.**

396 **a**, Schematic demand curves plotting reward consumption as a function of cost. Shallower slope

397 denotes higher motivation. **b**, Motivation parameter ( $1/\alpha$ ) on consecutive days with the same

398 reward (Spearman correlation,  $r=0.86$ ,  $P<0.0001$ ;  $n=44$  sessions from 12 mice). **c**, Free

399 consumption parameter ( $Q_0$ ) on consecutive days with the same reward (Spearman correlation,

400  $r=0.82$ ,  $P<0.0001$ ;  $n=44$  sessions from 12 mice). **d**, Average motivation as a function of sucrose

401 quantity and concentration (Mixed-effects model, fixed effect of quantity,  $F_{1,11}=3.95$ ,  $P=0.073$ ;

402 fixed effect of concentration,  $F_{1,11}=0.36$ ,  $P=0.56$ ;  $n=12$ ). **e**, Average free consumption as a

403 function of sucrose quantity and concentration (Mixed-effects model, fixed effect of quantity,  
404  $F_{1,11}=26.3$ ,  $P=0.0003$ ; fixed effect of concentration,  $F_{1,11}=9.88$ ,  $P=0.0093$ ; Tukey-corrected  
405 multiple comparisons: 10 $\mu$ L-5% vs 10 $\mu$ L-32%,  $P=0.025$ ; 10 $\mu$ L-5% vs 25 $\mu$ L-5%,  $P=0.0003$ ;  
406 10 $\mu$ L-32% vs 25 $\mu$ L-32%,  $P=0.0003$ ; 25 $\mu$ L-5% vs 25 $\mu$ L-32%,  $P=0.025$ ;  $n=12$ ). **f**, Left,  
407 representative demand curves from a single mouse exposed to four rewards. Right, the same  
408 demand curves, now normalized by free consumption. **g**, Schematic of FR5 shock task. **h**, **i**,  
409 Previously-measured motivation (**h**: Spearman correlation,  $r=0.79$ ,  $P=0.003$ ;  $n=12$ ) and free  
410 consumption (**i**: Spearman correlation,  $r=0.38$ ,  $P=0.22$ ;  $n=12$ ) versus number of shocks  
411 tolerated. NS, not significant; \* $P<0.05$ , \*\*\* $P<0.001$ . Error bars denote s.e.m.

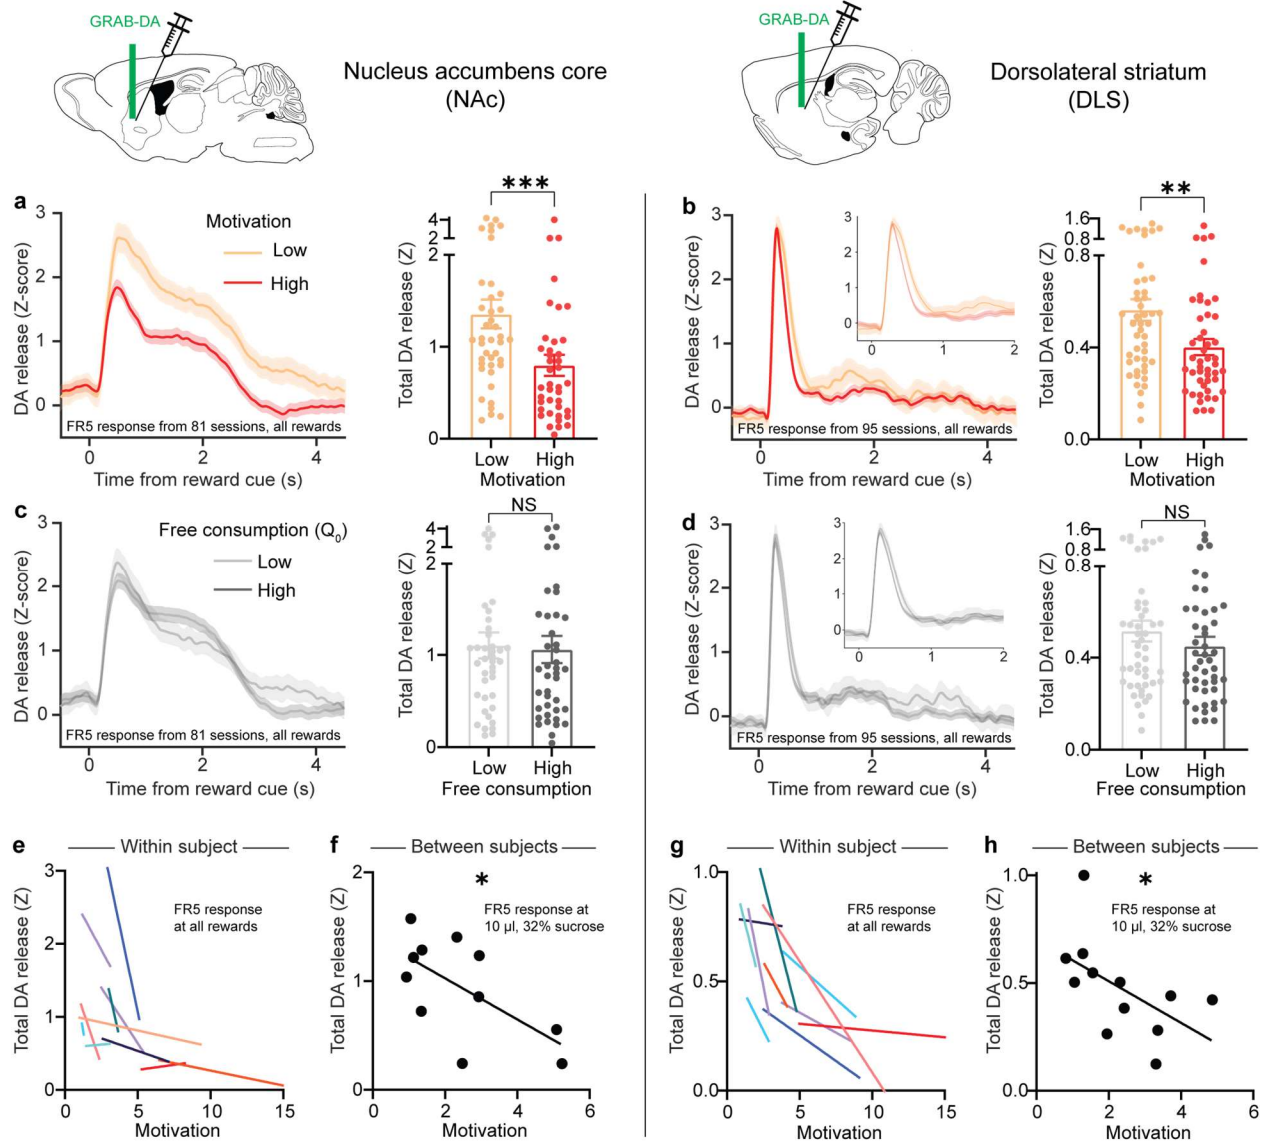

412

413 **Fig. 3: Striatal DA release inversely reflects a reward's motivational value.**

414 **a-d**, Left, Z-scored photometry traces of GRAB-DA fluorescence in the NAc (**a**, **c**) or DLS (**b**, **d**)

415 aligned to reward-predicting cues. Right, AUC of Z-scored photometry traces from 0 to 4s after

416 cue onset as a function of motivation (**a**: Mann-Whitney test,  $U=475$ ,  $P=0.001$ ;  $n=81$  sessions

417 from 12 mice; **b**: Mann-Whitney test,  $U=735$ ,  $P=0.0049$ ;  $n=94$  sessions from 12 mice) or free

418 consumption (**c**: Mann-Whitney test,  $U=775$ ,  $P=0.68$ ;  $n=81$  sessions from 12 mice, **d**: Mann-

419 Whitney test,  $U=978$ ,  $P=0.34$ ,  $n=94$  sessions from 12 mice). **e**, **g**, Motivation versus the AUC of

420 cue-evoked GRAB-DA signal in the NAc (**e**) or DLS (**g**) for individual mice (each colored line

421 denotes one mouse). **f**, **h**, Average motivation for 10  $\mu$ L, 32% sucrose reward versus the  
422 average GRAB-DA signal for the cue predicting that reward in the NAc (**f**: Spearman correlation,  
423  $r = -0.62$ ,  $P=0.048$ ;  $n=11$ ) or DLS (**h**: Spearman correlation,  $r = -0.64$ ,  $P=0.028$ ;  $n=12$ ). NS, not  
424 significant; \* $P<0.05$ , \*\* $P<0.01$ , \*\*\* $P<0.001$ . Error bars denote s.e.m.

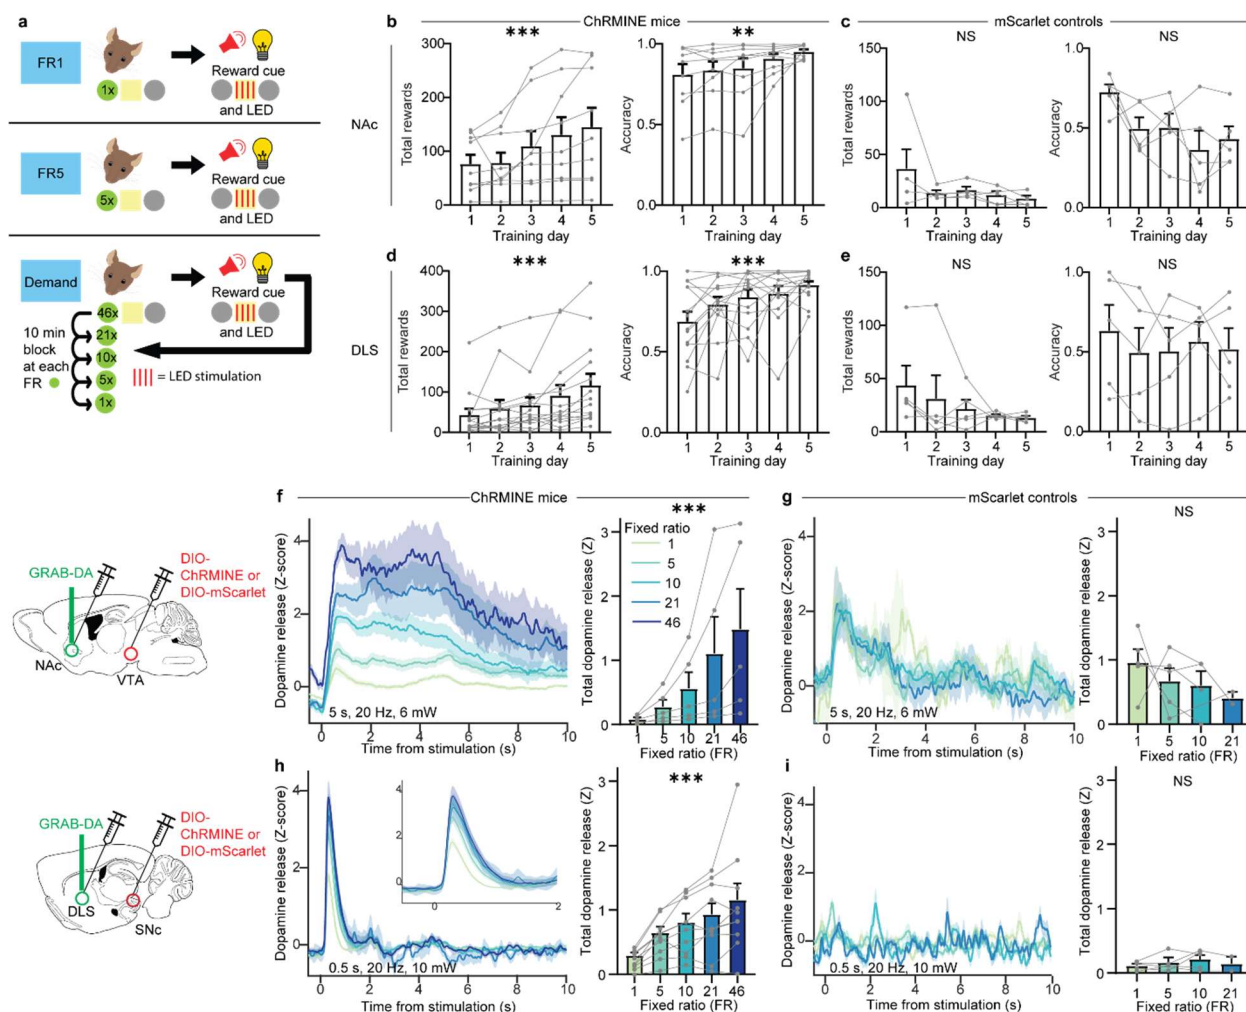

425

426 **Fig. 4: Optogenetically-evoked striatal DA release is sensitive to sunk cost.**

427 **a**, Schematic of optogenetic self-stimulation task. **b-e**, Number of rewards earned each day (left)

428 and fraction of nosepokes in the active poke (right) during FR1 training in mice with ChRMINE in

429 the NAc (**b**: rewards, Friedman test, Friedman statistic=31.9,  $P < 0.0001$ ;  $n = 9$ ; accuracy,

430 Friedman test, Friedman statistic=15.3,  $P = 0.0042$ ;  $n = 9$ ) or DLS (**d**: rewards, Friedman test,

431 Friedman statistic=31.2,  $P < 0.0001$ ;  $n = 14$ ; accuracy, Friedman test, Friedman statistic=19.8,

432  $P = 0.0006$ ;  $n = 14$ ), or control mice with mScarlet in the NAc (**c**: rewards, Friedman test, Friedman

433 statistic=9.01,  $P = 0.061$ ;  $n = 5$ ; accuracy, Friedman test, Friedman statistic=9.12,  $P = 0.058$ ;  $n = 5$ )

434 or DLS (**e**: rewards, Friedman test, Friedman statistic=2.87,  $P = 0.58$ ;  $n = 5$ ; accuracy, Friedman

435 test, Friedman statistic=1.92,  $P = 0.75$ ;  $n = 5$ ). **f-i**, Left, Z-scored photometry traces of GRAB-DA

436 fluorescence in the NAc (**f**, **g**) or DLS (**h**, **i**) aligned to optogenetic stimulation in ChRMINE mice  
437 (**f**, **h**) or mScarlet controls (**g**, **i**). Right, AUC of Z-scored photometry traces from 0 to 10s after  
438 stimulation onset as a function of FR in mice with ChRMINE in the NAc (**f**: Friedman test,  
439 Friedman statistic=20.0,  $P=0.0005$ ;  $n=5$ ) or DLS (**h**: Friedman test, Friedman statistic=32.4,  
440  $P<0.0001$ ;  $n=10$ ) or control mice with mScarlet in the NAc (**g**: Mixed-effects model,  $F_{3,12}=0.44$ ,  
441  $P=0.44$ ;  $n=5$ ) or DLS (**i**: Mixed-effects model,  $F_{3,8}=0.81$ ,  $P=0.52$ ;  $n=5$ ). NS, not significant;  
442  $*P<0.05$ ,  $**P<0.01$ ,  $***P<0.001$ . Error bars denote s.e.m.



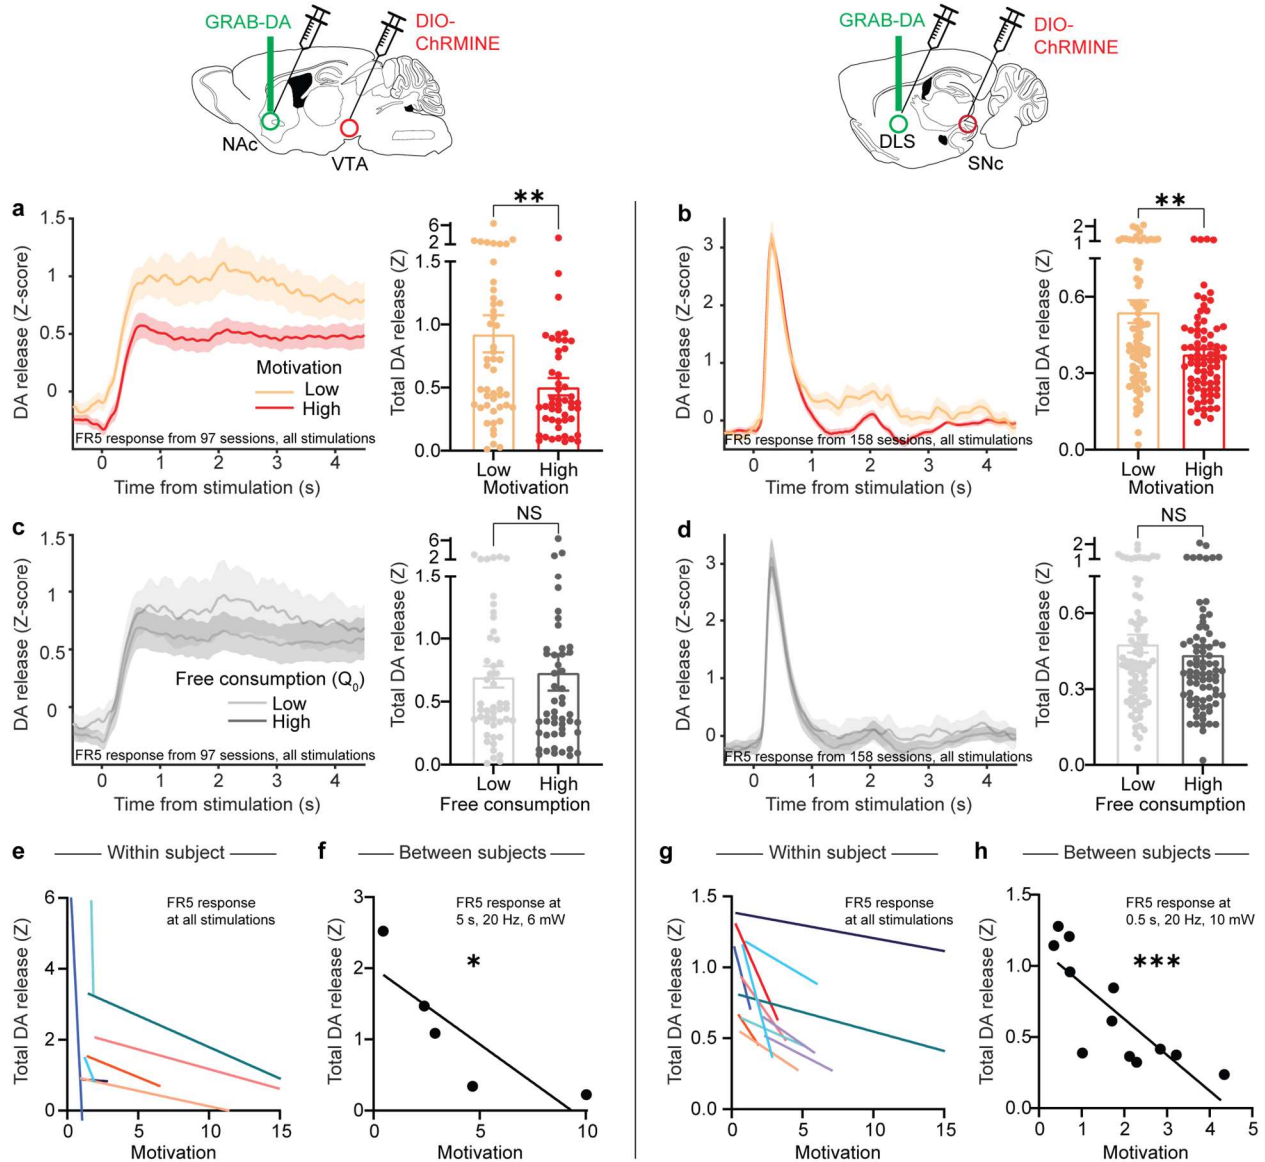

443

444 **Fig. 5: Optogenetically-evoked striatal DA release is inversely related to motivation.**

445 **a-d**, Left, Z-scored photometry traces of GRAB-DA fluorescence in the NAc (**a**, **c**) or DLS (**b**, **d**)

446 aligned to optogenetic stimulation. Right, AUC of Z-scored photometry traces from 0 to 4s after

447 stimulation onset as a function of motivation (**a**: Mann-Whitney test,  $U=798$ ,  $P=0.0061$ ;  $n=97$

448 sessions from 9 mice; **b**: Mann-Whitney test,  $U=2293$ ,  $P=0.0038$ ;  $n=158$  sessions from 14 mice)

449 or free consumption (**c**: Mann-Whitney test,  $U=1085$ ,  $P=0.52$ ;  $n=97$  sessions from 9 mice; **d**:

450 Mann-Whitney test,  $U=2812$ ,  $P=0.29$ ;  $n=158$  sessions from 14 mice). **e**, **g**, Motivation versus the

451 AUC of stimulation-evoked GRAB-DA signal in the NAc (**e**) or DLS (**g**) for individual mice (each

452 colored line denotes one mouse). **f**, **h**, Average motivation for optogenetic stimulation reward  
453 versus the average GRAB-DA signal for that reward in the NAc (**f**: Spearman correlation,  $r = -$   
454  $1.0$ ,  $P=0.017$ ;  $n=5$ ) or DLS (**h**: Spearman correlation,  $r = -0.86$ ,  $P=0.0006$ ;  $n=12$ ). NS, not  
455 significant;  $*P<0.05$ ,  $**P<0.01$ ,  $***P<0.001$ . Error bars denote s.e.m.

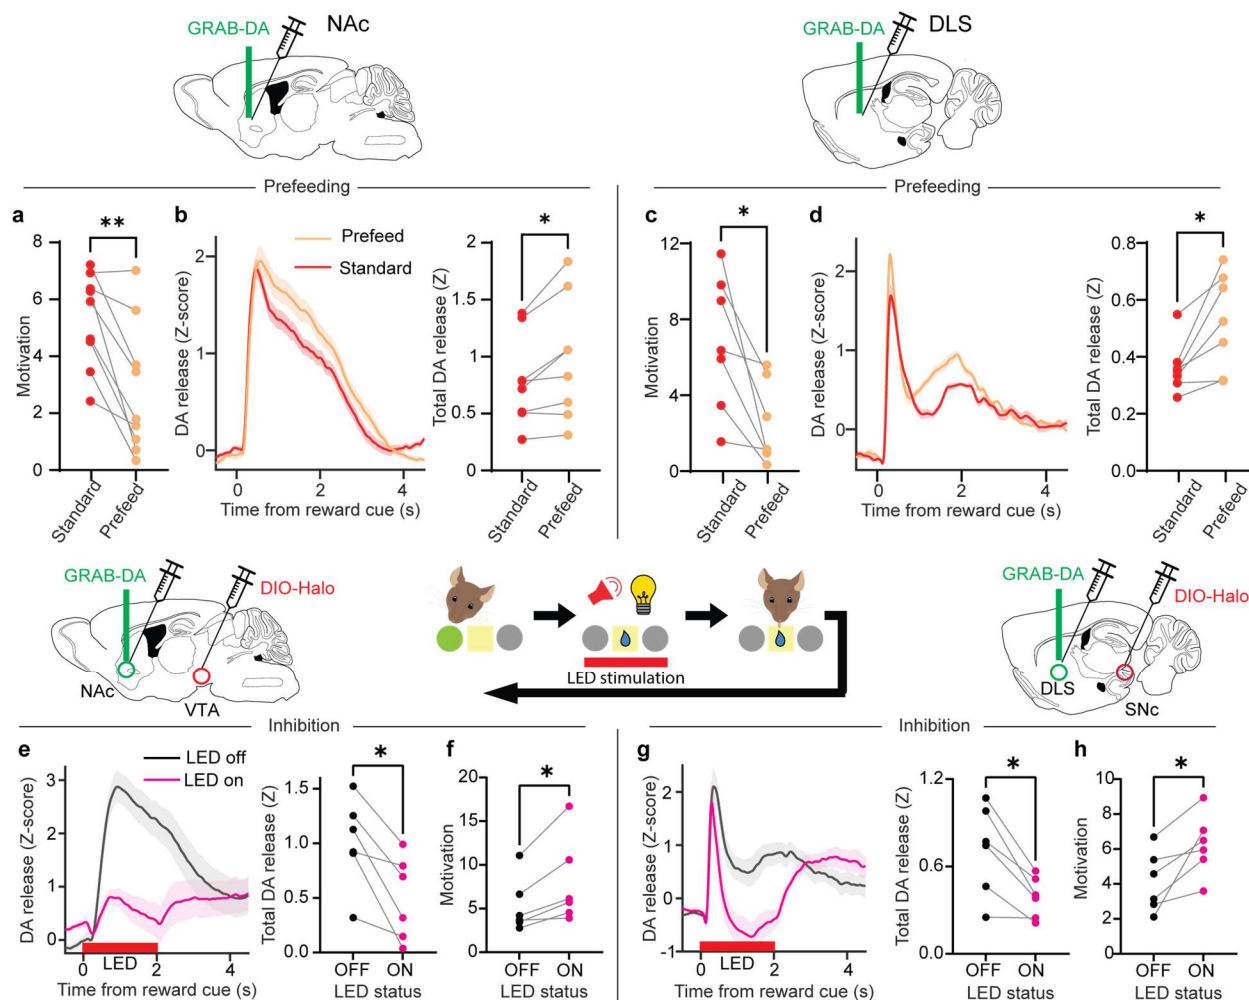

456

457 **Fig. 6: Bidirectional relationship between motivation and striatal DA release.**

458 **a, c**, Motivation for the same sucrose reward after 24-hr sucrose deprivation versus 30-min  
 459 unlimited sucrose consumption for mice with fiber implants in the NAc (**a**: Wilcoxon matched-  
 460 pairs signed rank test,  $W=-43$ ,  $P=0.0078$ ;  $n=9$ ) or DLS (**c**: Wilcoxon matched-pairs signed rank  
 461 test,  $W=-28$ ,  $P=0.016$ ;  $n=7$ ). **b, d**, Left, Z-scored photometry traces of GRAB-DA fluorescence in  
 462 the NAc (**b**) or DLS (**d**) aligned to reward-predicting cues. Right, AUC of Z-scored photometry  
 463 traces from 0 to 4s after cue onset in standard versus pre-fed conditions in the NAc (**b**:  
 464 Wilcoxon matched-pairs signed rank test,  $W=34$ ,  $P=0.016$ ;  $n=8$ ) or DLS (**d**: Wilcoxon matched-  
 465 pairs signed rank test,  $W=28$ ,  $P=0.016$ ;  $n=7$ ). **e, g**, Left, Z-scored photometry traces of GRAB-  
 466 DA fluorescence in the NAc (**e**) or DLS (**g**) aligned to cue onset in the optogenetic inhibition

467 experiment. Right, AUC of Z-scored photometry traces from 0 to 4 s after cue onset as a  
468 function of whether inhibitory optogenetic stimulation was delivered during the cue in the NAc  
469 (**e**: Wilcoxon matched-pairs signed rank test,  $W=-21$ ,  $P=0.031$ ;  $n=6$ ) or DLS (**g**: Wilcoxon  
470 matched-pairs signed rank test,  $W=-21$ ,  $P=0.031$ ;  $n=6$ ). **f**, **h**, Motivation in sessions with or  
471 without optogenetic inhibition in the NAc (**f**: Wilcoxon matched-pairs signed rank test,  $W=21$ ,  
472  $P=0.031$ ;  $n=6$ ) or DLS (**h**: Wilcoxon matched-pairs signed rank test,  $W=21$ ,  $P=0.031$ ;  $n=6$ ).  
473  $*P<0.05$ ,  $**P<0.01$ .

474 **METHODS**

475 **Mice**

476 Female and male mice, first-generation offspring of female CD-1 mice (Charles River, strain 22)  
477 and either male C57BL/6J mice (Jackson Laboratory, strain #664) or male DAT:IRES-Cre mice  
478 on a C57BL/6J background (Jackson Laboratory, strain #006660) were used as experimental  
479 subjects. This CD-1/C57 hybrid strategy was chosen to facilitate related research on aggressive  
480 behavior as previously validated<sup>47,48</sup>. All transgenic animals used in these experiments were  
481 genotyped and found to be heterozygous for Cre recombinase. Mice were group-housed before  
482 surgical procedures. After surgery, males were single-housed to reduce aggression within a  
483 cage. Behavioral experiments were conducted during the dark cycle (lights off at 09:00, on at  
484 21:00) when mice were 10-24 weeks old. Mice were maintained under food restriction for all  
485 behavioral experiments (>80% body weight from baseline ad libitum period). All procedures  
486 complied with the animal care standards set forth by the National Institutes of Health (NIH) and  
487 were approved by the Stanford University Administrative Panel on Laboratory Animal Care and  
488 Administrative Panel of Biosafety.

489

490 **Stereotactic injections and viruses**

491 Mice (8-12 weeks of age) were anesthetized with isoflurane (5% induction, 1-2% maintenance).  
492 Meloxicam (5 mg/kg) was administered subcutaneously at the start of surgery and 24 and 48  
493 hours after. Heads were fixed on a Kopf stereotaxic apparatus, a small incision was made in the  
494 scalp, and burr holes were drilled in the skull over the sites of injection. The following bregma  
495 coordinates were used: VTA, -3.1 mm anteroposterior (AP),  $\pm$ 0.7 mm mediolateral (ML), 4.2 mm  
496 dorsoventral (DV) from dura; SNc, -3.1 mm AP,  $\pm$ 1.0 mm ML, 4.3 mm DV; NAc, 1.5 mm AP,  
497  $\pm$ 0.9 mm ML, 4.2 mm DV; DLS, 0.8 mm AP,  $\pm$ 2.3 ML, 3.1 mm DV. Microliter syringes (Hamilton)  
498 were lowered to the specified depth from the dura and used to inject 0.5  $\mu$ L of virus solution at a  
499 flow rate of 0.1-0.25  $\mu$ L min<sup>-1</sup>. For experiments with two viral injections in the same location

500 (e.g., for optogenetic stimulation and photometry recording), a total of 1  $\mu$ L mixed solution was  
501 injected. Borosilicate optic fibers for photometry and/or optogenetic stimulation with 400- $\mu$ m  
502 diameter and numerical aperture 0.66 (Doric) were implanted directly above the striatal virus  
503 injection site, ipsilateral to the midbrain virus injection site, and secured to the skull using light-  
504 cured dental adhesive cement (Geristore A&B paste, DenMat). For the cohort with recordings in  
505 both NAc and DLS (Extended Data Fig. 1a), the NAc and DLS fibers were implanted in different  
506 hemispheres. For other cohorts, the hemisphere was counterbalanced between mice.

507 Adeno-associated viruses (AAVs) used for stereotactic injections were AAV9-hSyn-  
508 DA2m (DA4.4, WZ Biosciences), AAV-8-EF1 $\alpha$ -DIO-ChRmine-mScarlet-WPRE (Stanford Gene  
509 Vector and Virus Core), AAV-8-EF1 $\alpha$ -DIO-mScarlet-WPRE (Stanford Gene Vector and Virus  
510 Core), and AAV-DJ-EF1 $\alpha$ -DIO-NpHR3.0-mCherry (Stanford Gene Vector and Virus Core). AAV  
511 titres ranged from  $1 \times 10^{12}$  to  $2 \times 10^{13}$  gc ml<sup>-1</sup>.

512

### 513 **Optogenetic manipulations**

514 For photostimulation of ChRMINE or NpHR, optical implants were connected to a 625nm LED  
515 light source (Prizmatix) via a plastic fiber (1mm diameter, NA 0.63) and a fiber optic rotary joint  
516 (Doric). In an attempt to mimic DA release dynamics for natural reward, we used slightly  
517 different sets of ChRMINE stimulation parameters for NAc and DLS. For the data presented in  
518 Fig. 4 and Extended Data Fig. 4, NAc stimulation was kept at 5 s, 20 Hz and 6mW, while DLS  
519 stimulation was kept at 0.5 s, 20 Hz and 10 mW, all with a pulse width of 10 ms. On other  
520 demand sessions (data shown in Fig. 5 and Extended Data Fig. 5), frequency was varied from  
521 1-20 Hz, duration from 0.5-30 seconds and power from 3-10 mW, while pulse width was kept at  
522 10ms. We found that these parameter changes did not systematically affect either motivation or  
523 DA release in the demand task, and thus we combined all sessions for the analyses in Fig. 5a-  
524 d, e, g and Extended Data Fig. 5. For NpHR stimulation, light was turned on (10 mW at fiber tip)  
525 for 2 s, only during the cue period.

526

## 527 **Fiber photometry**

528 For photometry recordings, optical implants were connected to low-autofluorescence patch  
529 cords (400  $\mu\text{m}$  diameter, 0.57 numerical aperture, Doric) via a ceramic sleeve (Doric). Signals  
530 then passed through a fiber optic rotary joint (Doric) before filtering through a fluorescence mini  
531 cube (Doric) and ultimately reaching a femtowatt photodetector (2151; Newport). Frequency-  
532 modulated blue (465 nm) and UV (405 nm) LEDs (Doric) were used to stimulate GRAB-DA  
533 emission and control signals through the same fibers. Blue LED power was adjusted to  $\sim 30\mu\text{W}$   
534 at the fiber tip to ensure that the photodetector was not being saturated. Digital signals were  
535 sampled at 1.0173 kHz, demodulated, lock-in amplified, and recorded by a real-time signal  
536 processor (RZ5P, Tucker-Davis Technologies) using Synapse software (Tucker-Davis  
537 Technologies). Synchronized behavioral events from the Med Associates boxes were collected  
538 directly into the RZ5P digital input ports. To reduce any confounds from photobleaching,  
539 animals were recorded for about 5 min before behavioral testing began.

540

## 541 **Behavioral training**

542 Behavioral training began at least 2 weeks after virus injections. For the first 2 days, mice were  
543 tethered to the fiber optic patch cord and allowed to explore the behavioral chambers (Med  
544 Associates) for 30 minutes. Each chamber had a speaker for white noise and three identical  
545 nose ports, each with an associated light and an infrared emitter-sensor to measure port entry  
546 times. The central nose port was defined as the reward port and was equipped to receive 10-25  
547  $\mu\text{L}$  sucrose (at 5% or 32% concentration) from a syringe pump.

548 After habituation to the chamber and tether, mice were exposed to 2 days of a Pavlovian  
549 task, in which rewards were delivered at random intervals between 25 and 35 s for 30 min. Each  
550 reward was delivered in tandem with a 2-s light-sound cue (white noise and central port light),  
551 with the goal that the mice would begin to associate the cue with reward delivery. Mice were

552 then trained on FR1, meaning that a single poke in the active port was required for reward  
553 delivery. The identity of the active port (left or right) was kept consistent for each mouse, but  
554 counterbalanced between mice. For at least the first 3 days, or until the mice achieved 10  
555 rewards per session, the active port was baited with a fruit loop to encourage the mice to  
556 explore that port. The bait was then removed and mice continued with at least five days of FR1,  
557 or until the number of rewards per session remained within 20% for 3 consecutive days. The  
558 training data in Fig. 1 derives from these unbaited FR1 sessions. Mice were then trained on FR5  
559 until they achieved at least 10 rewards per session for 3 consecutive days, and then moved  
560 onto demand sessions (see below).

561 Training for optogenetic self-stimulation (Figs. 4-5) was identical, except instead of  
562 sucrose reward being delivered at the time of the light-sound cue, mice received optogenetic  
563 stimulation. Recording data from the optogenetic Pavlovian and FR5 sessions are shown in  
564 Extended Data Fig. 4e-g.

565 Male and female mice were used in approximately equal numbers in all behavioral tasks  
566 and there was no sex difference in any experimental condition. Subject mice were excluded  
567 from the analysis (less than 5% of 86 total) if they did not reach behavioral criteria or if on the  
568 basis of histological analysis, they had: (1) off-target transgene expression; (2) weak transgene  
569 expression; or (3) inaccurate implant placement.

570

### 571 **Demand sessions**

572 During demand sessions, mice experienced 5 consecutive 10-min blocks, each with a different  
573 FR, in the following order: FR46, FR21, FR10, FR5, FR1. This order was chosen after extensive  
574 piloting showed that random presentation of FRs produced erratic responses, which is  
575 consistent with prior work<sup>49</sup>. We chose not to use an ascending order of FRs to reduce the  
576 chance of satiety from rapid consumption of rewards early in a session. In control experiments,



577 we confirmed that the demand curves extracted from single sessions were similar to those  
578 extracted over 5 days, with a different FR presented on each day (data not shown).

579 On each trial, mice poked the required number of times in the active port and on the last  
580 required poke, the 2-s light-sound cue was presented. In the sucrose task, cue onset was  
581 simultaneous with sucrose delivery into the central port. After the cue ended and mice entered  
582 the central port to consume the sucrose, a light turned on in the active port denoting that  
583 another trial had begun and mice were free to poke again. In the optogenetic task, cue onset  
584 was simultaneous with LED stimulation. As soon as both LED stimulation and the cue had  
585 ended, a light turned on in the active port denoting that another trial had begun and mice were  
586 free to poke again.

587 We continued demand sessions for a single reward type for at least 2 days, or until the  
588 alpha parameter achieved stability within 20%. We then switched the reward type (i.e., sucrose  
589 volume or concentration or LED power, frequency or duration). The order of reward types was  
590 counterbalanced between mice.

591

### 592 **Shock experiment**

593 After mice had completed the sucrose demand sessions, they returned to the standard FR5 task  
594 for one day, and on the next day performed the FR5-shock task. In this task, mice received  
595 reward as usual after 5 pokes, but on a randomly-selected 30% of trials, they also received a  
596 mild shock (0.2 mA, 0.5 s) through an electrified grid floor (Med Associates).

597

### 598 **Prefeeding experiment**

599 Mice were trained to stability on the demand task as above, having access to sucrose only  
600 during the task itself. They then underwent a prefeeding procedure as follows: 30 min before the  
601 session, they were given access to 1.5 mL sucrose in their home cage. If they finished the  
602 sucrose, they were given another 0.5 mL, and if they finished that, they were given another 0.5

603 mL, and so on until the session was scheduled to begin. We found that this graded approach  
604 maintained the subjects' motivation to perform the task better than providing unlimited sucrose  
605 (data not shown).

606

### 607 **Optogenetic inhibition experiment**

608 DAT-Cre mice were injected with Cre-dependent NpHR3.0 in the VTA or SNc and GRAB-DA in  
609 the NAc or DLS, respectively, and a fiber was implanted above the striatal target. After 2 weeks  
610 of recovery, mice were trained on the sucrose demand sessions as usual, without any  
611 optogenetic stimulation, until the alpha parameter stabilized within 20% on 2 consecutive days.  
612 They then underwent inhibition experiments, which were identical except for the addition of 2-s  
613 red light stimulation during each cue period. Mice underwent at least 3 optogenetic sessions,  
614 until the alpha parameter stabilized within 20%. Data in Fig. 6e-h are derived from the last 2  
615 days of standard performance and the last 2 days of optogenetic stimulation, when performance  
616 was stable.

617

### 618 **Alternating FR experiment**

619 Mice were trained on the sucrose FR1 and FR5 tasks as usual and were then split into two  
620 cohorts. One cohort performed a task with 4, 10-min blocks in the following order: FR10, then  
621 FR1, then FR1, then FR10. The other cohort performed a task with the following order: FR1,  
622 then FR10, then FR10, then FR1. Each cohort repeated the task on 2 consecutive days and the  
623 data in Extended Data Fig. 2e-h comes from the average of the 2 days. We designed these  
624 tasks to compare cued DA responses on consecutive blocks as a function of FR order (1 before  
625 10 or 10 before 1). Our design allows for both within-subject comparisons (analyzing the first 2  
626 blocks vs the last 2 blocks of a session) and between-subject comparisons (analyzing the first 2  
627 blocks in one cohort vs the other cohort).

628

629 **Anesthetized recording experiment**

630 DAT-Cre mice were injected with Cre-dependent ChRMINE in the VTA or SNc and GRAB-DA in  
631 the NAc or DLS, respectively, and a fiber was implanted above the striatal target. After 2 weeks  
632 of recovery, mice were anesthetized with ketamine (60 mg/kg) and dexmedetomidine (0.6  
633 mg/kg) through intraperitoneal injection, placed on a heating pad to maintain body temperature,  
634 and tethered to the photometry setup as usual. We then recorded GRAB-DA signals while mice  
635 received 60 optogenetic stimulations (for NAc: 5 s, 20 Hz, 6mW; for DLS: 0.5 s, 20 Hz, 10 mW)  
636 at intervals chosen at random from the following options: 5 s, 10 s, 20 s, 30 s, 70 s and 120 s.  
637 These intervals were chosen because they were the average intervals between rewards during  
638 the optogenetic demand task (NAc: 5s, 10s, 30s, 70s, 120s; DLS: 10s, 20s, 30s, 70s, 120s).

639

640 **Immunohistochemistry**

641 Mice were perfused with 4% PFA and brains were removed and post-fixed overnight at 4 °C.  
642 70–75- $\mu$ m coronal sections were prepared on a vibratome and free-floating sections were  
643 processed for immunohistochemistry. After three 10-min washes in PBS on a shaker, the tissue  
644 was incubated with blocking solution (5% normal goat serum and 0.3% Triton X-100 in PBS) for  
645 1 hour and then incubated in primary antibodies overnight at 4 °C on a shaker. The primary  
646 antibodies used were: rat mCherry monoclonal antibody 1:1,000 (Invitrogen, M11217)  
647 and chicken anti-GFP 1:1,000 (Aves labs, GFP-1020). After three washes of 10 min in PBS,  
648 secondary antibodies were added and incubated for 2 h at room temperature on a shaker. The  
649 secondary antibodies used were: goat anti-rat Alexa Fluor 594 1:750 (Invitrogen, A11007) and  
650 goat anti-chicken Alexa Fluor 488 1:750 (Abcam, ab150169). After three more washes, the  
651 slices were mounted with DAPI Fluoromount-G mounting medium (SouthernBiotech) onto  
652 microscopy slides for visualization at 4x using a Keyence BZ-X810 slide scanner (Keyence Plan  
653 Apo Chromat 4 $\times$  objective, NA 0.20, filter cubes: DAPI, GFP, TRITC, wavelength: 430–741 nm,  
654 bit depth of images: 14 bit).

655

## 656 **Data analysis**

657 Custom scripts in MATLAB (MathWorks) were used for signal processing. Signals were down-  
658 sampled 10x, underwent Loess smoothing (window size = 30 ms) to reduce high-frequency  
659 noise, and analyzed in 16-s windows around each cue delivery. Z-scores of the fluorescence for  
660 each trial were calculated based on the mean and standard deviation of the local baseline signal  
661 before each cue (-8 to -4 s before cue onset). Trials were combined into a single session  
662 average, and sessions were then averaged together for a single mouse. All photometry figures  
663 in the manuscript show the mean and standard error of the photometry signal across mice, a  
664 more conservative approach than using the trial- or session-average. To quantify total DA  
665 release, area under the curve was calculated using trapezoidal numerical integration on the Z-  
666 scores for the windows defined in the figure legends. To compare high- vs low-motivation  
667 sessions (Fig. 3a-d; Fig. 5a-d), we performed a median split by the alpha parameter.

668 To minimize bleaching confounds, we removed the first ~5 minutes of each recording,  
669 when the steepest bleaching was likely to occur. We also analyzed short windows of data with  
670 local baselines, avoiding any analysis of longer-timescale changes, which are more likely to be  
671 confounded by bleaching or other gradual changes (e.g., slight adjustments in the connection  
672 between the implant and the patch cord). In addition, we took the approach reported by Sych et  
673 al<sup>50</sup> and examined simultaneously-recorded control signals (405 nm), which we found to be flat  
674 or slightly negative traces with substantially lower amplitude than what we observed with the  
675 experimental excitation (465 nm). Although this analysis is imperfect because 405 nm is not the  
676 isosbestic point for GRAB-DA<sup>51</sup>, the result implies that motion artifacts, bleaching, or other  
677 intrinsic, non-DA dependent signal changes could not have made a major contribution to our  
678 results.

679 Finally, we repeated all of our analyses using two methods to correct for bleaching, and  
680 our results held regardless of method. In the first method, the entire session was debleached

681 according to the iterative method outlined by Bruno et al<sup>52</sup>, which calculates the  $\Delta F/F$  in short  
682 moving windows, centers and normalizes these windows, and then repeats these calculations  
683 for 100 temporally-offset windows in the same session. The final debleached signal is the  
684 average of the 100 iterations. In the second method, we used polynomial curve fitting to fit the  
685 control 405 signal to the experimental 465 signal, then subtracted the fitted 405 signal from the  
686 experimental signal, and based all subsequent analyses on this subtracted signal. We chose not  
687 to complete this as our primary analysis because 405 nm is not the isosbestic point for GRAB-  
688 DA and because we observed that the bleaching rates for the two signals were often poorly  
689 aligned.

690 To produce demand curves, we used the nonlinear least squares method to fit  
691 behavioral data from each session to the following exponential equation<sup>22</sup>:

$$692 \quad \ln(Q) = \ln(Q_0) + k(e^{-\alpha Q_0 C} - 1)$$

693 where Q is the number of rewards earned in a block, C is the cost (FR) of each reward for that  
694 block, and k is a constant that specifies the range of Q (here we set  $k = 3.2$ ). From these fits we  
695 extracted estimates of 2 parameters:  $Q_0$ , or the preferred consumption at no cost; and  $\alpha$ , the  
696 slope or elasticity of the curve. We then converted  $\alpha$  to our measure of motivation, also known  
697 as essential value, with the following equation<sup>24</sup>:

$$698 \quad \text{Motivation} = 1/(100 * \alpha * k^{1.5})$$

699 As in prior work<sup>23</sup>, goodness of fit was calculated with  $R^2$  and sessions were included in  
700 analysis only when  $R^2 > 0.3$ . The median  $R^2$  ranged between 0.88 and 0.94 for the different  
701 behavioral cohorts.

702

### 703 **Statistical methods and reproducibility**

704 All experiments were performed without knowledge of the virus that had been injected or the  
705 transgene being expressed, and were analyzed without knowledge of the specific manipulation  
706 each mouse had undergone. No statistical methods were used to predetermine sample size,

707 which was based on previous experience with the variance of the assays. All data were tested  
708 for normality of sample distributions and when violated, non-parametric statistical tests were  
709 used. Friedman's test was used to compare three or more matched groups (e.g., DA response  
710 from the same animals across 5 FRs). If individual data points were missing from these  
711 matched comparisons, mixed-effects models were used instead. Mixed-effects models were  
712 also used when examining the effects of multiple fixed effects (e.g., sucrose quantity and  
713 concentration) accounting for the random effect of subject. In these cases, the significance of  
714 the fixed effects was reported in the figure legends and if there were significant fixed effects,  
715 Tukey-corrected post-hoc comparisons were reported with asterisks in the figures. Wilcoxon  
716 matched-pairs signed rank tests were used to compare two paired groups (e.g., DA response  
717 from the same animals across two concentrations of sucrose). Spearman correlations were  
718 used to measure the association between two independently-measured observations (e.g.,  
719 motivation on consecutive days). Mann-Whitney tests were used to compare two unmatched  
720 groups (e.g., DA response in high-motivation vs low-motivation sessions). Kruskal-Wallis tests  
721 were used to compare three or more unmatched groups (e.g., DA responses from trials with  
722 different inter-reward intervals). All statistical tests were two-sided and performed in MATLAB  
723 (Mathworks) or Prism (GraphPad). NS, not significant. \* $P < 0.05$ , \*\* $P < 0.01$ , \*\*\* $P < 0.001$ . In all  
724 figures, data are shown as mean  $\pm$  s.e.m.

725

## 726 **References**

- 727 47. Golden, S. A. *et al.* Persistent conditioned place preference to aggression experience in  
728 adult male sexually-experienced CD-1 mice. *Genes Brain Behav.* **16**, 44–55 (2017).
- 729 48. Golden, S. A. *et al.* Nucleus Accumbens Drd1-Expressing Neurons Control Aggression Self-  
730 Administration and Aggression Seeking in Mice. *J. Neurosci.* **39**, 2482–2496 (2019).

- 731 49. Schelp, S. A. *et al.* A transient dopamine signal encodes subjective value and causally  
732 influences demand in an economic context. *Proc Natl Acad Sci U S A* **114**, E11303–E11312  
733 (2017).
- 734 50. Sych, Y., Chernysheva, M., Sumanovski, L. T. & Helmchen, F. High-density multi-fiber  
735 photometry for studying large-scale brain circuit dynamics. *Nat Methods* **16**, 553–560  
736 (2019).
- 737 51. Sun, F. *et al.* Next-generation GRAB sensors for monitoring dopaminergic activity in vivo.  
738 *Nat Methods* **17**, 1156–1166 (2020).
- 739 52. Bruno, C. A. *et al.* pMAT: An open-source software suite for the analysis of fiber photometry  
740 data. *Pharmacology Biochemistry and Behavior* **201**, 173093 (2021).
- 741

742 **ACKNOWLEDGMENTS**

743 We thank Marija Kamceva, Zihui Zhang, Anjali Temal, Ariana Rodrigues and members of the  
744 STAAR and Malenka labs for technical assistance and discussions. The Stanford Gene Vector  
745 and Virus Core provided reagents. This work was supported by philanthropic funds donated to  
746 the Nancy Pritzker Laboratory at Stanford University. N.E. was supported by NIH grant K08  
747 MH123791, a Brain & Behavior Research Foundation Young Investigator Grant, a Burroughs  
748 Wellcome Fund Career Award for Medical Scientists, a Stanford Society of Physician Scholars  
749 Research Grant and the Simons Foundation Bridge to Independence Award. G.T. and A.R.W.  
750 were supported by Stanford MedScholars grants. D.C.P. was supported by an NSF Graduate  
751 Research Fellowship and an HHMI Gilliam Fellowship (with R.C.M.). R.C.M. was supported by a  
752 Stanford University Wu Tsai Neurosciences Institute grant and NIH grant P50 DA042012.

753

754 **AUTHOR CONTRIBUTIONS**

755 N.E. and B.S.B. conceived the study with support from R.C.M. N.E. designed the experiments  
756 with input from R.C.M. N.E. and R.C.M. interpreted the results and wrote the paper, which was  
757 edited by all authors. A.R.W. designed and performed the sucrose photometry experiments.  
758 G.C.T. designed and performed the inhibition and prefeeding experiments. G.C.T., A.K.O.,  
759 A.N.S., A.M.G., and L.T. performed the optogenetics experiments. D.C.P. and J.T. contributed  
760 to the design and analysis of the optogenetics experiments. D.C.P. performed the histological  
761 verifications of fiber placements.

762

763 **DATA AVAILABILITY**

764 The datasets generated and analyzed during this study are included in this article and available  
765 from the corresponding authors upon reasonable request.

766

767 **CODE AVAILABILITY**



768 Code used for data processing and analysis is available from the corresponding authors upon  
769 reasonable request.

770

771 **COMPETING INTEREST DECLARATION**

772 All protocols used during this study are freely available for non-profit use from the corresponding  
773 authors upon reasonable request. N.E. is a consultant for Boehringer Ingelheim. R.C.M. is on  
774 the scientific advisory boards of MapLight Therapeutics, MindMed, Bright Minds Biosciences,  
775 Cycleron and AZ Therapies.

776

777 **ADDITIONAL INFORMATION**

778 Correspondence and requests for materials should be addressed to Neir Eshel  
779 ([neshel@stanford.edu](mailto:neshel@stanford.edu)) and Robert C. Malenka ([malenka@stanford.edu](mailto:malenka@stanford.edu)).

780

781

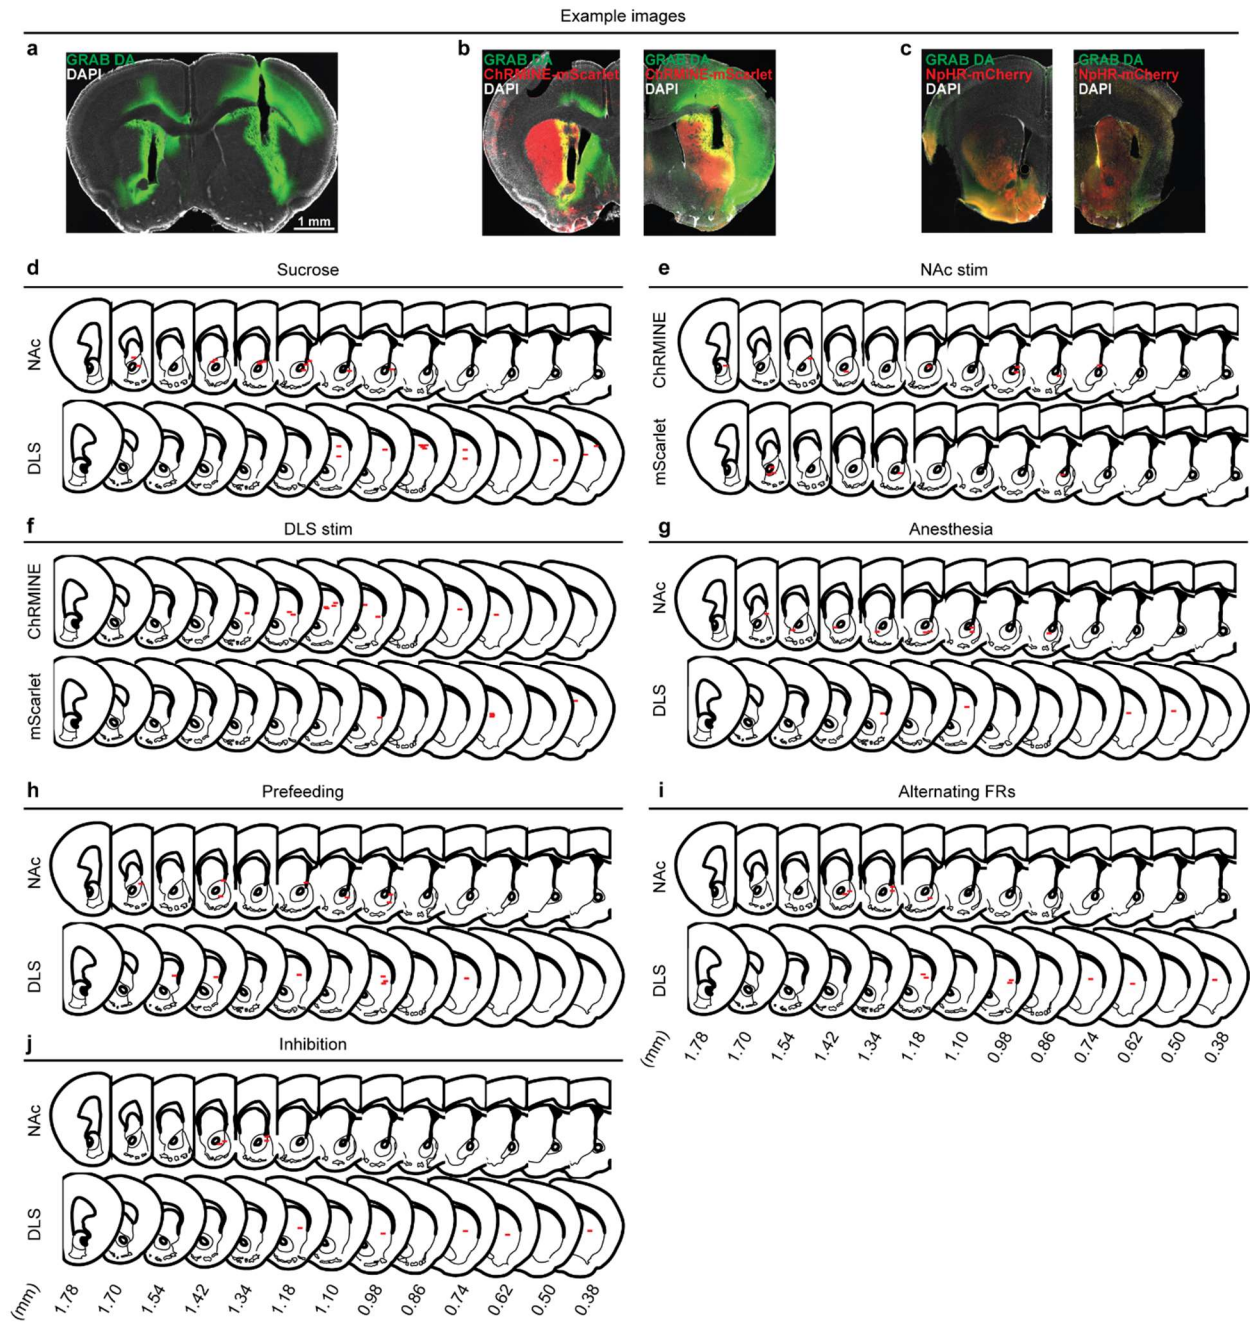

782

783 **Extended Data Fig. 1: Histological validation of fiber implant targeting.**

784 **a**, Bilateral fiber implants and GRAB-DA expression in a representative mouse used in the  
 785 sucrose experiments. **b**, Fiber implants and GRAB-DA and ChRMINE expression in the NAc  
 786 (left) and DLS (right) for representative mice in the optogenetic stimulation experiments. **c**, Fiber  
 787 implants and GRAB-DA and NpHR expression in the NAc (left) and DLS (right) for  
 788 representative mice in the optogenetic inhibition experiments. **d**, Fiber implant tip locations in

789 the NAc (top) and DLS (bottom) of mice used in the sucrose experiments. **e**, Fiber implant tip  
790 locations in the NAc of mice expressing ChRMINE (top) or mScarlet (bottom) used in the  
791 optogenetic stimulation experiments. **f**, Fiber implant tip locations in the DLS of mice expressing  
792 ChRMINE (top) or mScarlet (bottom) used in the optogenetic stimulation experiments. **g**, Fiber  
793 implant tip locations in the NAc (top) or DLS (bottom) of mice used in the anesthesia  
794 experiments. **h**, Fiber implant tip locations in the NAc (top) or DLS (bottom) of mice used in the  
795 prefeeding experiment. **i**, Fiber implant tip locations in the NAc (top) or DLS (bottom) of mice  
796 used in the alternating FRs experiments. **j**, Fiber implant tip locations in the NAc (top) or DLS  
797 (bottom) of mice used in the optogenetic inhibition experiments. Mice used in more than one  
798 experiment have their fiber placement repeated in each experiment.

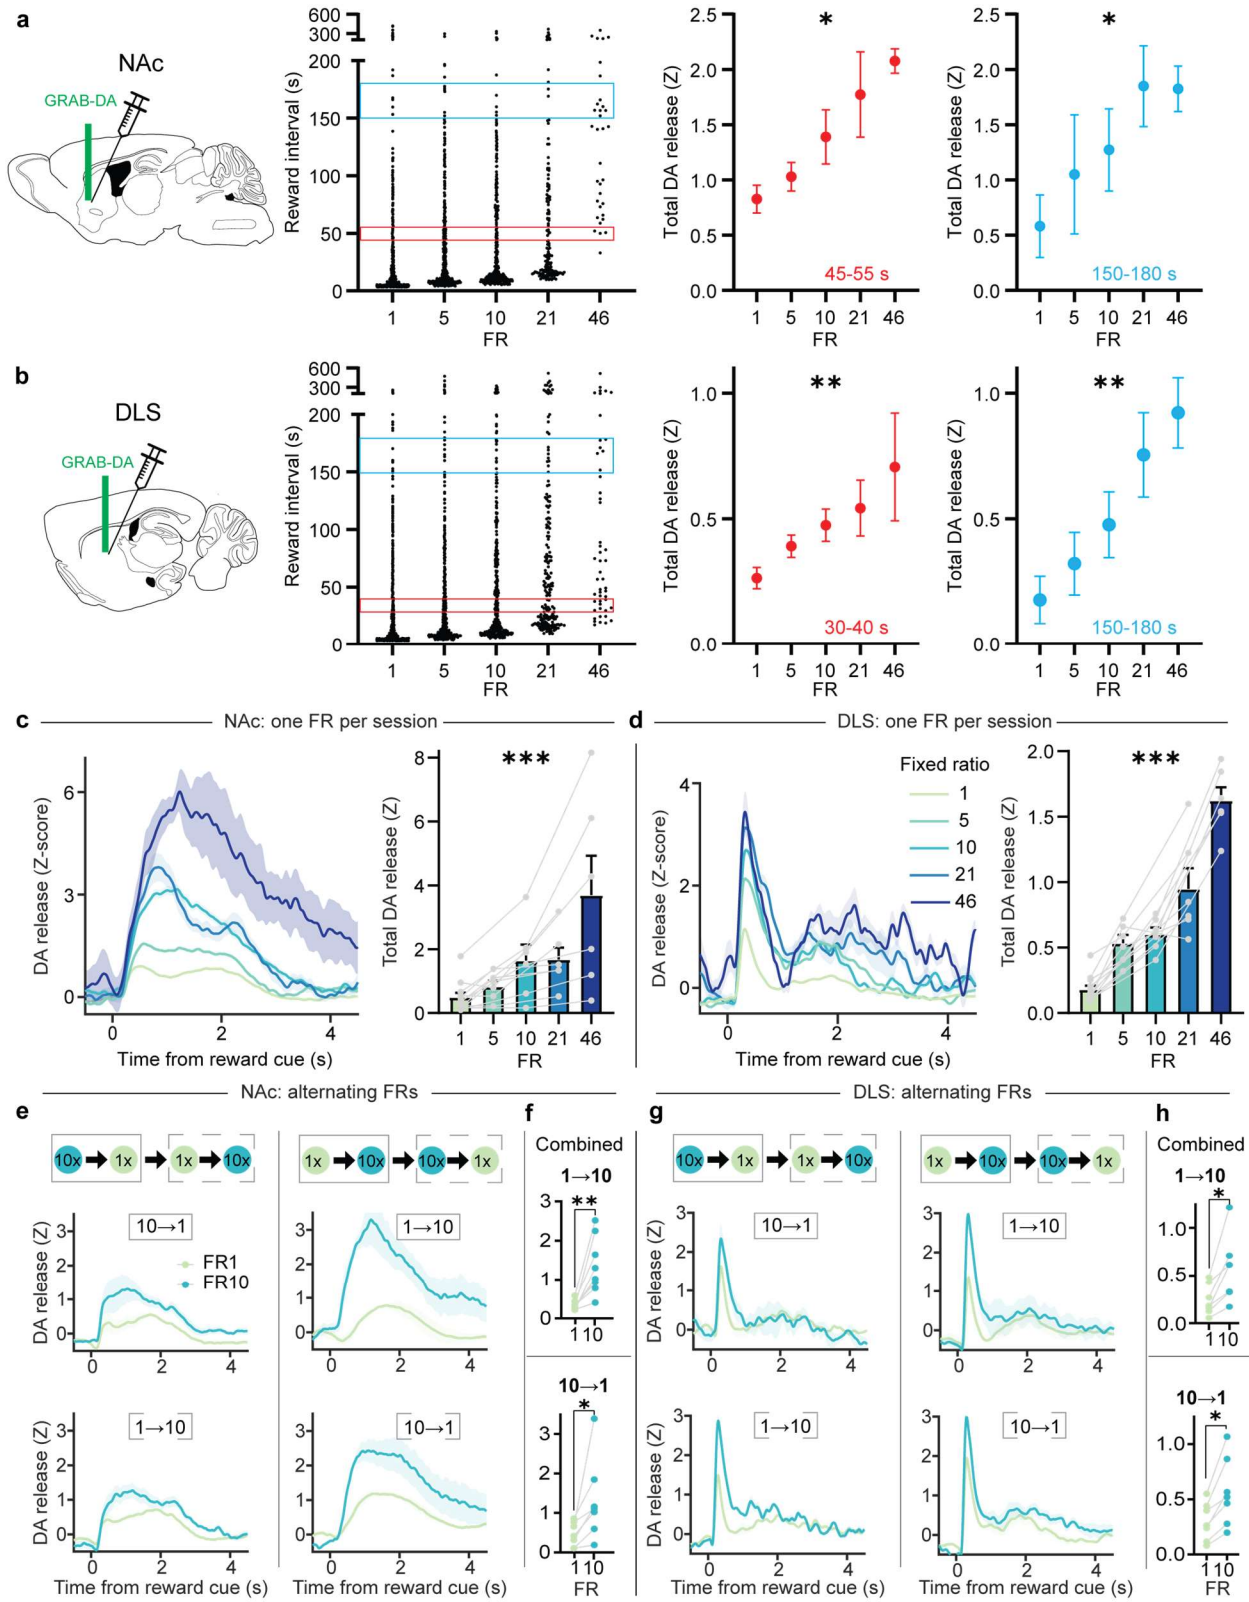

799

800 **Extended Data Fig. 2: The effect of FR on DA release does not depend on inter-reward**  
801 **interval or the order of FRs.**

802 **a, b**, Left, Distribution of inter-reward intervals as a function of FR for mice with fibers in the NAc  
803 (**a**) or DLS (**b**). Middle, Right, AUC of GRAB-DA photometry traces in response to reward cues  
804 on trials with short (Middle, **a**: Kruskal-Wallis test, Kruskal-Wallis statistic=9.97,  $P=0.04$ ;  $n=12$ ; **b**:  
805 Kruskal-Wallis test, Kruskal-Wallis statistic=10.99,  $P=0.027$ ;  $n=12$ ) or long (Right, **a**: Kruskal-  
806 Wallis test, Kruskal-Wallis statistic=14.5,  $P=0.006$ ;  $n=12$ ; **b**: Kruskal-Wallis test, Kruskal-Wallis  
807 statistic=15.9,  $P=0.003$ ;  $n=12$ ) inter-reward intervals. **c, d**, Left, Z-scored photometry traces of  
808 GRAB-DA fluorescence in the NAc (**c**) or DLS (**d**) aligned to cue onset in sessions with a single  
809 FR. Right, AUC of Z-scored photometry traces from 0 to 4s after cue onset as a function of FR  
810 in the NAc (**c**: Mixed-effects model,  $F_{4,20}=9.47$ ,  $P=0.0002$ ;  $n=12$ ) or DLS (**d**: Mixed-effects  
811 model,  $F_{4,20}=73.1$ ,  $P<0.0001$ ;  $n=12$ ). **e, g**, Left, Z-scored photometry traces of GRAB-DA  
812 fluorescence in the NAc (**e**) or DLS (**g**) for mice performing a session with FRs presented in the  
813 following order: 10, then 1, then 1, then 10. Right, Z-scored photometry traces for a separate  
814 cohort of mice that performed a session with the following FR order: 1, then 10, then 10, then 1.  
815 Top, fluorescence traces for the first two FRs presented in a session. Bottom, fluorescence  
816 traces for the last two FRs presented in a session. **f, h**, Top, AUC of Z-scored photometry traces  
817 in the NAc (**f**: Wilcoxon matched-pairs signed rank test,  $W=36$ ,  $P=0.0078$ ;  $n=8$ ) or DLS (**h**:  
818 Wilcoxon matched-pairs signed rank test,  $W=28$ ,  $P=0.016$ ;  $n=7$ ) for consecutive blocks in which  
819 FR1 is presented before FR10. Bottom, AUC of Z-scored photometry traces in the NAc (**f**:  
820 Wilcoxon matched-pairs signed rank test,  $W=28$ ,  $P=0.016$ ;  $n=7$ ) or DLS (**h**: Wilcoxon matched-  
821 pairs signed rank test,  $W=28$ ,  $P=0.016$ ;  $n=7$ ) for consecutive blocks in which FR10 is presented  
822 before FR1. Regardless of FR order or timing within a session, FR10 trials always elicited  
823 greater DA release than FR1 trials. \* $P<0.05$ , \*\* $P<0.01$ , \*\*\* $P<0.001$ .

824

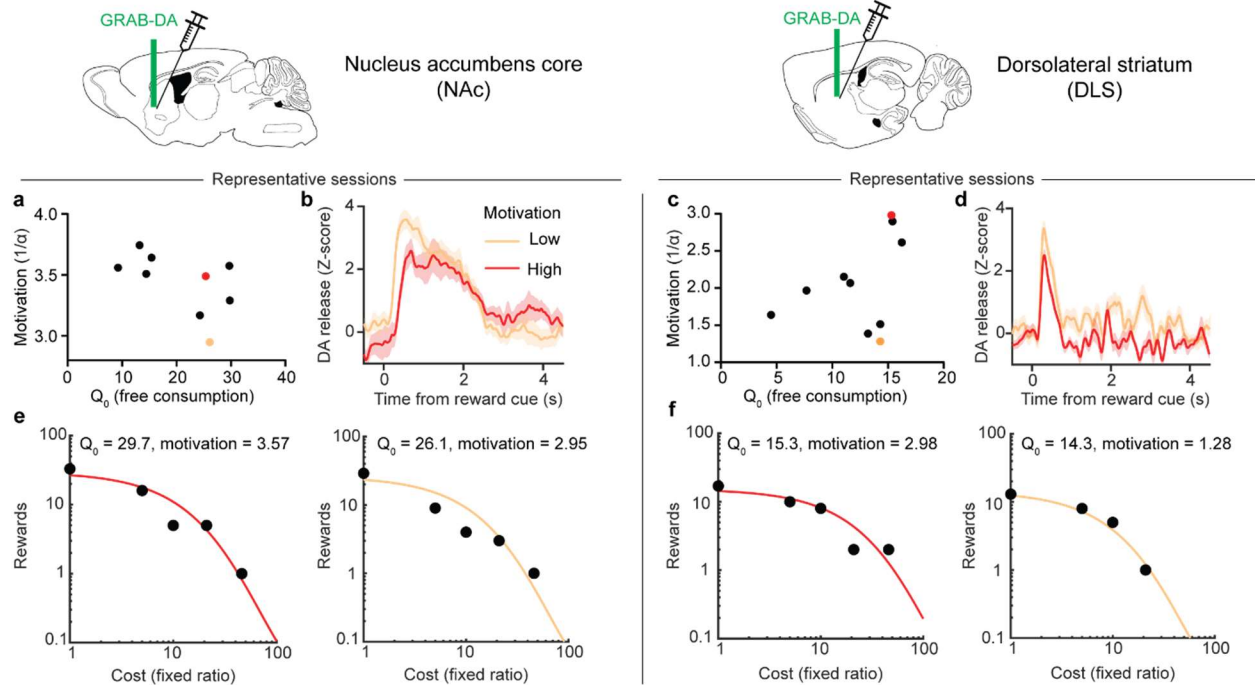

825

826 **Extended Data Fig. 3: Representative examples of the inverse relationship between**  
 827 **motivation and DA release for sucrose rewards.**

828 **a, c**, Free consumption parameter versus motivation parameter extracted from individual  
 829 sessions in one representative mouse with recordings in the NAc (**a**) or DLS (**c**). **b, d**, Z-scored  
 830 photometry traces of GRAB-DA fluorescence in the NAc (**b**) or DLS (**d**) for the sessions marked  
 831 by colored circles in **a** and **c**, which differ primarily in motivation rather than free consumption. **e**,  
 832 **f**, Demand curves for the sessions marked by colored circles in **a** and **c**. The demand curves  
 833 have similar y-intercepts but differ in slope.

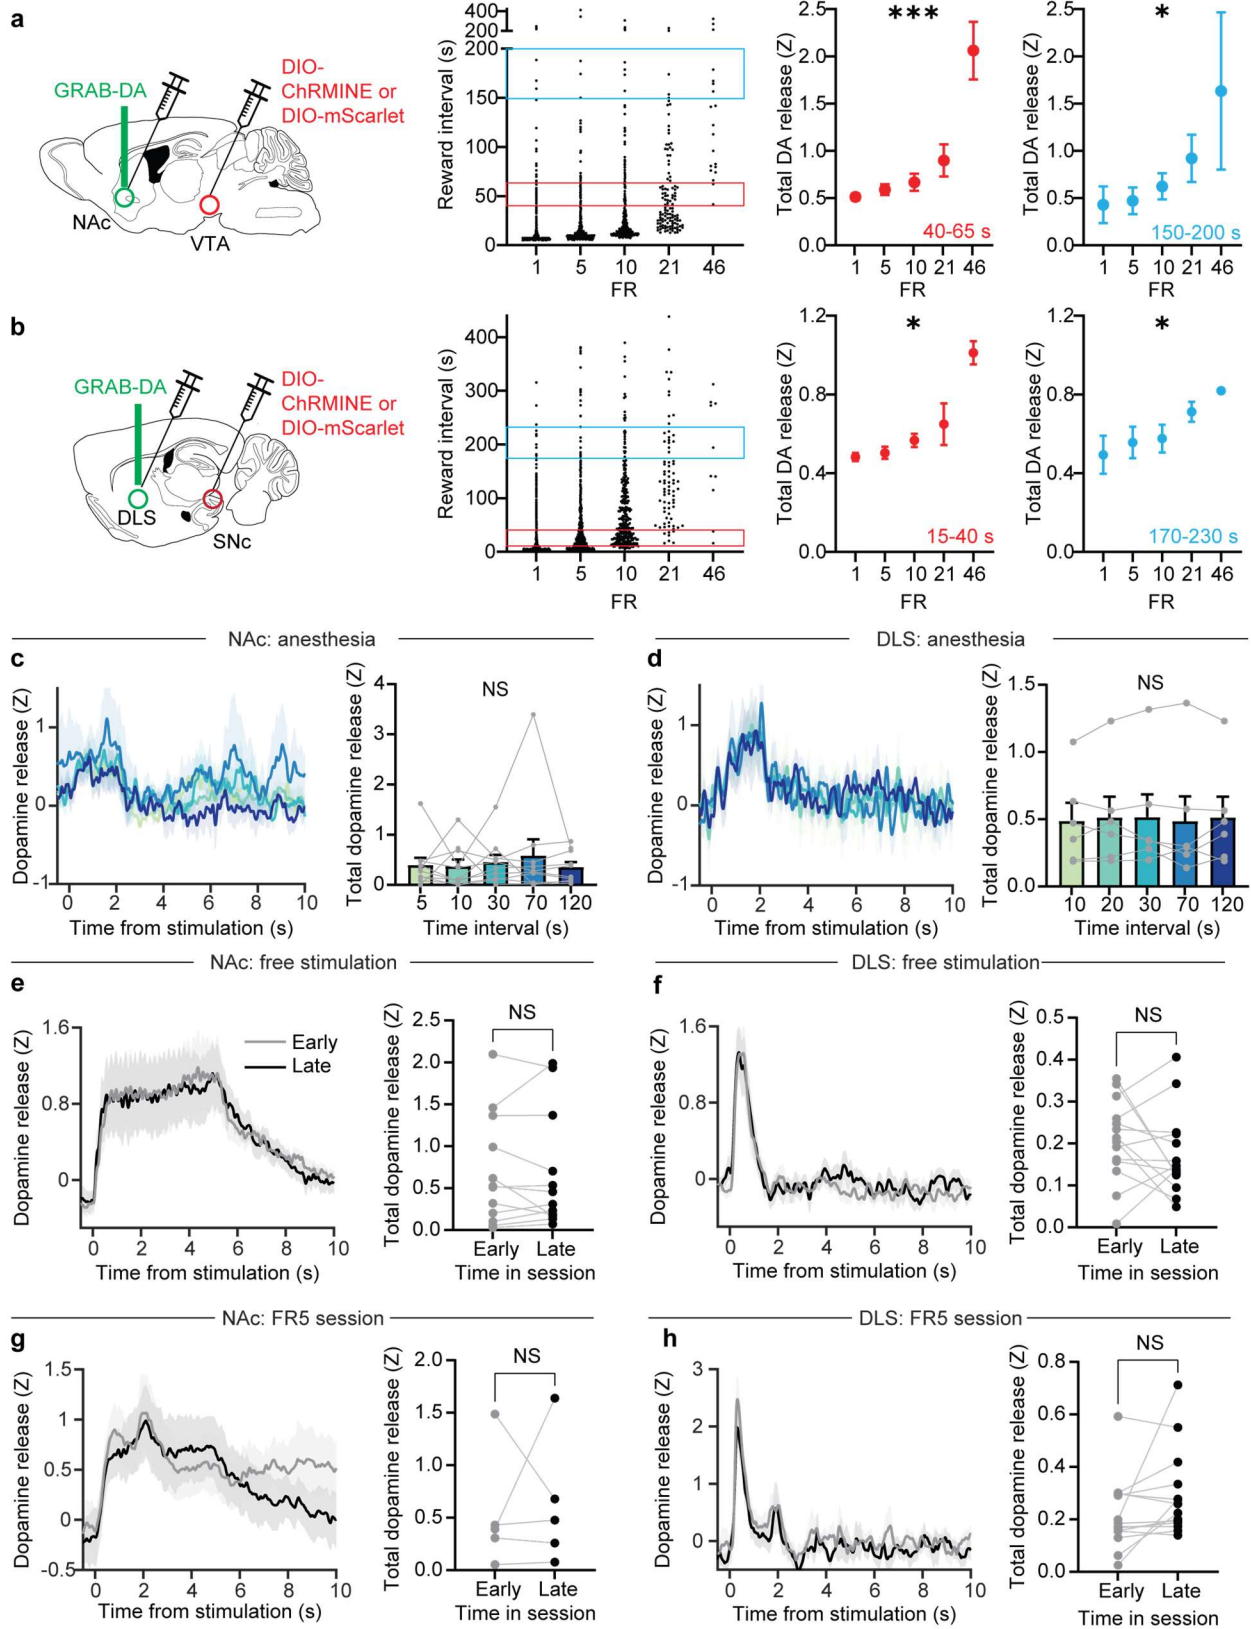

835 **Extended Data Fig. 4: The effect of FR on optogenetically-evoked DA release does not**  
836 **depend on inter-stimulation interval or timing.**

837 **a, b**, Left, Distribution of inter-reward intervals as a function of FR for mice with fibers in the NAc  
838 **(a)** or DLS **(b)**. Middle, Right, AUC of GRAB-DA photometry traces in response to optogenetic  
839 stimulation on trials with short (Middle, **a**: Kruskal-Wallis test, Kruskal-Wallis statistic=74.5,  
840  $P<0.0001$ ;  $n=2946$  trials from 9 mice; **b**: Kruskal-Wallis test, Kruskal-Wallis statistic=10.8,  
841  $P=0.029$ ;  $n=1288$  trials from 14 mice) or long (Right, **a**: Kruskal-Wallis test, Kruskal-Wallis  
842 statistic=10.1,  $P=0.04$ ;  $n=25$  trials from 9 mice; **b**: Kruskal-Wallis test, Kruskal-Wallis  
843 statistic=9.45,  $P=0.05$ ;  $n=78$  trials from 14 mice) inter-reward intervals. **c, d**, Left, Z-scored  
844 photometry traces of GRAB-DA fluorescence in the NAc **(c)** or DLS **(d)** in response to  
845 optogenetic stimulation at different intervals for mice under anesthesia. Right, AUC of Z-scored  
846 photometry traces in the NAc **(c**: Friedman test, Friedman statistic=3.28,  $P=0.51$ ;  $n=10$ ) or DLS  
847 **(d**: Friedman test, Friedman statistic=0.98,  $P=0.91$ ;  $n=6$ ) as a function of inter-stimulation  
848 interval. Intervals were chosen based on the average inter-reward intervals for each FR in the  
849 demand task. **e, f**, Left, Z-scored photometry traces of GRAB-DA fluorescence in the NAc **(e)** or  
850 DLS **(f)** during a session in which stimulation was given at random intervals without any  
851 nose-poking requirement. Right, AUC of Z-scored photometry traces in the NAc **(e**: Wilcoxon  
852 matched-pairs signed rank test,  $W=-6$ ,  $P=0.85$ ;  $n=12$ ) or DLS **(f**: Wilcoxon matched-pairs signed  
853 rank test,  $W=-27$ ,  $P=0.43$ ;  $n=14$ ) in the first half or last half of each free-reward session. **g, h**,  
854 Left, Z-scored photometry traces of GRAB-DA fluorescence in the NAc **(g)** or DLS **(h)** during a  
855 session in which stimulation was always given at FR5. Right, AUC of Z-scored photometry  
856 traces in the NAc **(g**: Wilcoxon matched-pairs signed rank test,  $W=1$ ,  $P>0.99$ ;  $n=5$ ) or DLS **(h**:  
857 Wilcoxon matched-pairs signed rank test,  $W=61$ ,  $P=0.058$ ;  $n=14$ ) in the first half or last half of  
858 each FR5 session. NS, not significant; \* $P<0.05$ , \*\*\* $P<0.001$ . Error bars denote s.e.m.



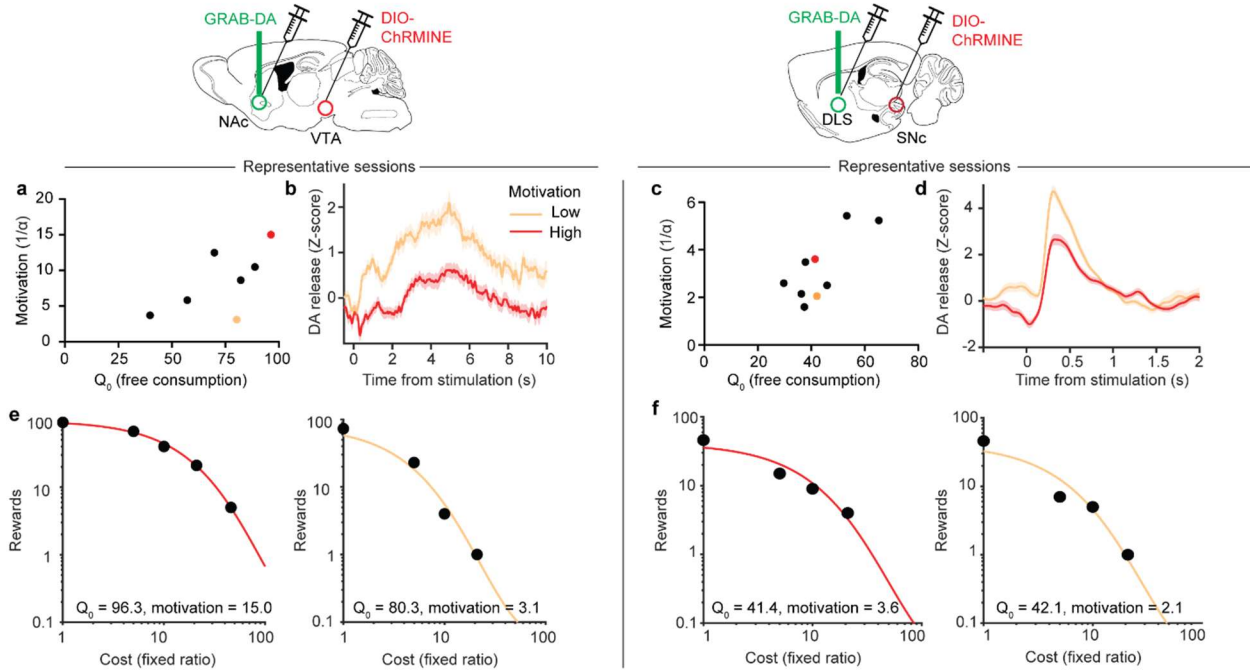

Source: https://www.biorxiv.org/content/10.1101/2022.09.20.508777v1.full.pdf
